# Supplementary material for: Beyond campus borders: wastewater surveillance sheds light on university COVID-19 interventions and their community impact
Source: Royal Society of Chemistry journal article supplement (doi:10.1039/d4ew00168k), 2024-07-05
Supplement: d4ew00168k1.pdf [file d4ew00168k1.pdf]

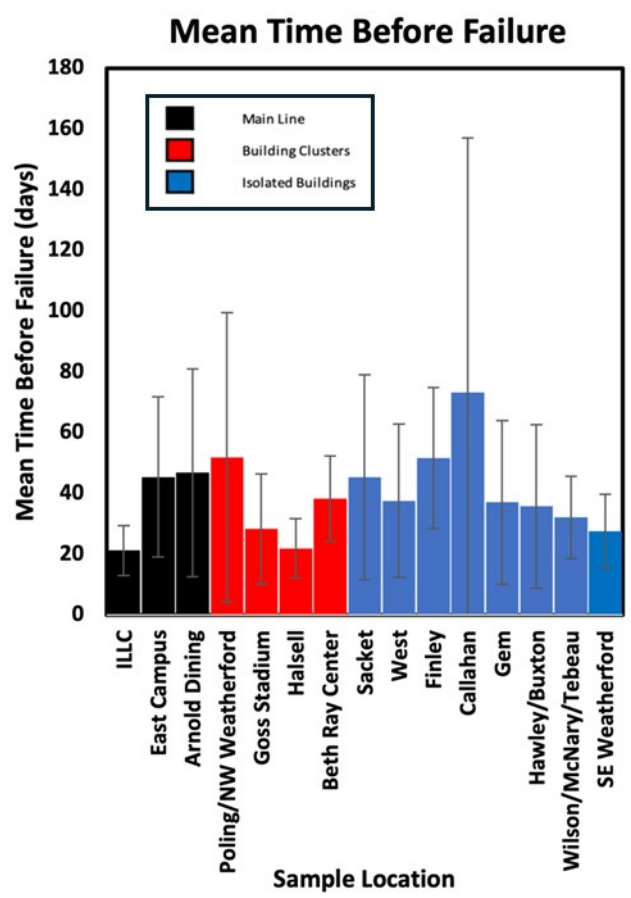

**Figure S2.** Mean time before failure (MTBF) for autosampler collection points on campus and in the surrounding community. Error bars represent the 95% confidence interval.

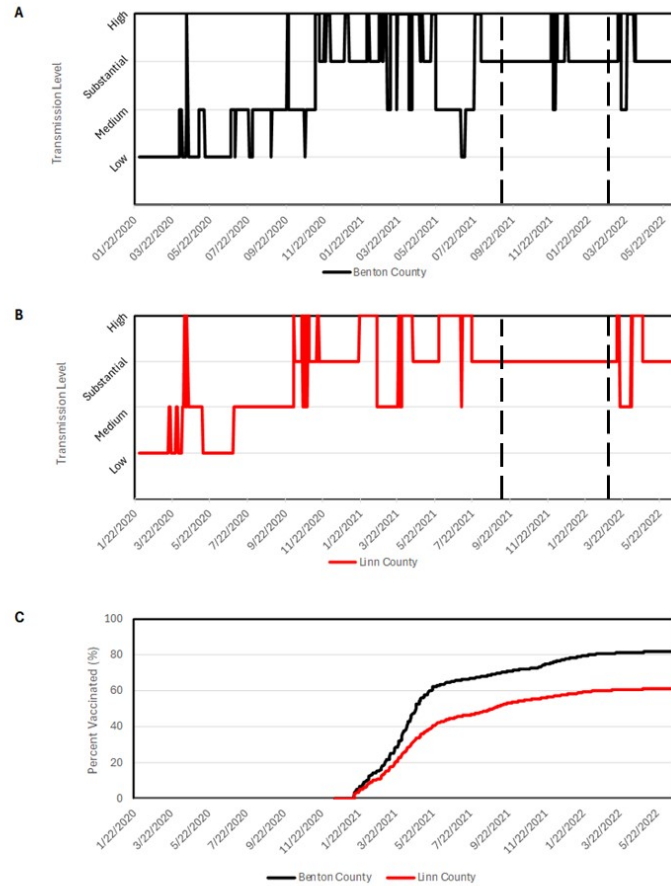

**Figure S3.** Transmission and Vaccination Levels within Linn and Benton Counties. **(A)** Benton County Transmission Levels, **(B)** Linn County Transmission Levels, **(C)** Benton and Linn County percentage of population having received first COVID-19 vaccination. Dashed lines represent starting periods for Campus Opening (9/15/2021) and Mask Mandate Removal (2/27/2022), respectively.
