# Supplementary material for: Beyond campus borders: wastewater surveillance sheds light on university COVID-19 interventions and their community impact
Source: Royal Society of Chemistry journal article supplement (doi:10.1039/d4ew00168k), 2024-07-05
Supplement: d4ew00168k2.xlsx [file d4ew00168k2.xlsx]

## Sheet: Campus Reported Cases per 10000
Date	New Cases/10,000 (ZIP CODE: 97331)	Cumulative Cases/10000 (ZIP CODE: 97331)		COVID-19 Case Data Released by the Oregon Health Authority
2020-05-03	9	9		The Oregon State University Campus comprises the totality of the 97331 Zipcode area
2020-05-10	0	9
2020-05-17	0	9
2020-05-24	0	9
2020-05-31	0	9
2020-06-07	0	9
2020-06-14	0	9
2020-06-21	0	9
2020-06-28	0	9
2020-07-05	0	9
2020-07-12	0	9
2020-07-19	0	9
2020-07-26	0	9
2020-08-02	0	9
2020-08-09	0	9
2020-08-16	0	9
2020-08-23	0	9
2020-08-30	0	9
2020-09-06	0	9
2020-09-13	0	9
2020-09-20	14	23
2020-09-27	4	27
2020-10-04	0	27
2020-10-11	0	27
2020-10-18	1	28
2020-10-25	1	29
2020-11-01	0	29
2020-11-08	0	29
2020-11-15	3	32
2020-11-22	0	32
2020-11-29	3	35
2020-12-06	2	37
2020-12-13	4	41
2020-12-20	-2	39
2020-12-27	0	39
2021-01-03	-1	38
2021-01-10	6	44
2021-01-17	8	52
2021-01-24	18	70
2021-01-31	11	81
2021-02-07	15	96
2021-02-14	11	107
2021-02-21	12	119
2021-02-28	6	125
2021-03-07	9	134
2021-03-14	4	138
2021-03-21	1	139
2021-03-28	1	140
2021-04-04	1	141
2021-04-11	1	142
2021-04-18	0	142
2021-04-25	2	144
2021-05-02	3	147
2021-05-09	5	152
2021-05-16	1	153
2021-05-23	3	156
2021-05-30	0	156
2021-06-06	0	156
2021-06-13	0	156
2021-06-20	2	158
2021-06-27	0	158
2021-07-04	0	158
2021-07-11	0	158
2021-07-18	0	158
2021-07-25	2	160
2021-08-01	1	161
2021-08-08	0	161
2021-08-15	2	163
2021-08-22	0	163
2021-08-29	1	164
2021-09-05	0	164
2021-09-12	4	168
2021-09-19	7	175
2021-09-26	4	179
2021-10-03	0	179
2021-10-10	4	183
2021-10-17	11	194
2021-10-24	27	221
2021-10-31	3	224
2021-11-07	0	224
2021-11-14	6	230
2021-11-21	5	235
2021-11-28	2	237
2021-12-05	2	239
2021-12-12	0	239
2021-12-19	1	240
2021-12-26	1	241
2022-01-02	42	283
2022-01-09	222	505
2022-01-16	110	615
2022-01-23	95	710
2022-01-30	34	744
2022-02-06	27	771
2022-02-13	8	779
2022-02-20	5	784
2022-02-27	3	787
2022-03-06	1	788
2022-03-13	0	788
2022-03-20	0	788
2022-03-27	1	789
2022-04-03	3	792
2022-04-10	3	795
2022-04-17	7	802
2022-04-24	4	806
2022-05-01	6	812
2022-05-08	3	815
2022-05-15	11	826
2022-05-22	3	829
2022-05-29	5	834
2022-06-05	4	838
2022-06-12	5	843
2022-06-19	1	844
2022-06-26	2	846
2022-07-03	0	846
2022-07-10	2	848
2022-07-17	1	849
2022-07-24	1	850
2022-07-31	0	850

## Sheet: Corvallis Rainwater Data
Corvallis Weather Data from Hyslop Farm Station				https://agsci.oregonstate.edu/hyslop-weather-station
Date	Rainfall (in)
2021-04-10	0.1
2021-04-11	0
2021-04-12	0
2021-04-13	0
2021-04-14	0
2021-04-15	0
2021-04-16	0
2021-04-17	0
2021-04-18	0
2021-04-19	0
2021-04-20	0
2021-04-21	0
2021-04-22	0
2021-04-23	0
2021-04-24	0.09
2021-04-25	0.16
2021-04-26	0.05
2021-04-27	0
2021-04-28	0
2021-04-29	0
2021-04-30	0
2021-05-01	0.4
2021-05-02	0.02
2021-05-03	0
2021-05-04	0
2021-05-05	0
2021-05-06	0
2021-05-07	0.1
2021-05-08	0.08
2021-05-09	0
2021-05-10	0
2021-05-11	0
2021-05-12	0
2021-05-13	0
2021-05-14	0
2021-05-15	0
2021-05-16	0
2021-05-17	0
2021-05-18	0
2021-05-19	0
2021-05-20	0.02
2021-05-21	0
2021-05-22	0
2021-05-23	0
2021-05-24	0.01
2021-05-25	0.14
2021-05-26	0
2021-05-27	0
2021-05-28	0.1
2021-05-29	0
2021-05-30	0
2021-05-31	0
2021-06-01	0
2021-06-02	0
2021-06-03	0
2021-06-04	0
2021-06-05	0
2021-06-06	0
2021-06-07	0
2021-06-08	0
2021-06-09	0
2021-06-10	0
2021-06-11	0
2021-06-12	0.18
2021-06-13	0.98
2021-06-14	0.51
2021-06-15	0
2021-06-16	0.08
2021-06-17	0
2021-06-18	0
2021-06-19	0
2021-06-20	0
2021-06-21	0
2021-06-22	0
2021-06-23	0
2021-06-24	0
2021-06-25	0
2021-06-26	0
2021-06-27	0
2021-06-28	0
2021-06-29	0
2021-06-30	0
2021-07-01	0
2021-07-02	0
2021-07-03	0
2021-07-04	0
2021-07-05	0
2021-07-06	0
2021-07-07	0
2021-07-08	0
2021-07-09	0
2021-07-10	0
2021-07-11	0
2021-07-12	0
2021-07-13	0
2021-07-14	0
2021-07-15	0
2021-07-16	0
2021-07-17	0
2021-07-18	0
2021-07-19	0
2021-07-20	0
2021-07-21	0
2021-07-22	0
2021-07-23	0
2021-07-24	0
2021-07-25	0
2021-07-26	0
2021-07-27	0
2021-07-28	0
2021-07-29	0
2021-07-30	0
2021-07-31	0
2021-08-01	0
2021-08-02	0
2021-08-03	0
2021-08-04	0
2021-08-05	0
2021-08-06	0
2021-08-07	0
2021-08-08	0
2021-08-09	0
2021-08-10	0
2021-08-11	0
2021-08-12	0
2021-08-13	0
2021-08-14	0
2021-08-15	0
2021-08-16	0
2021-08-17	0
2021-08-18	0
2021-08-19	0
2021-08-20	0
2021-08-21	0
2021-08-22	0
2021-08-23	0
2021-08-24	0
2021-08-25	0
2021-08-26	0
2021-08-27	0
2021-08-28	0
2021-08-29	0
2021-08-30	0
2021-08-31	0
2021-09-01	0
2021-09-02	0
2021-09-03	0
2021-09-04	0
2021-09-05	0
2021-09-06	0
2021-09-07	0
2021-09-08	0
2021-09-09	0
2021-09-10	0
2021-09-11	0
2021-09-12	0
2021-09-13	0
2021-09-14	0
2021-09-15	0
2021-09-16	0
2021-09-17	0
2021-09-18	0.73
2021-09-19	0.33
2021-09-20	0.22
2021-09-21	0
2021-09-22	0
2021-09-23	0.1
2021-09-24	0
2021-09-25	0

## Sheet: Campus Wastewater Conductivity
Sample Date	Location	Conductivity (mS/cm)
2021-04-11	Arnold Dining	498
2021-04-11	Arnold Dining	498
2021-04-14	Arnold Dining	598
2021-04-14	Arnold Dining	598
2021-04-18	Arnold Dining	633
2021-04-18	Arnold Dining	633
2021-04-21	Arnold Dining	552
2021-04-21	Arnold Dining	552
2021-04-25	Arnold Dining	494
2021-04-25	Arnold Dining	494
2021-05-02	Arnold Dining	574
2021-05-02	Arnold Dining	574
2021-05-05	Arnold Dining	728
2021-05-05	Arnold Dining	728
2021-05-09	Arnold Dining	669
2021-05-09	Arnold Dining	669
2021-05-12	Arnold Dining	469.5
2021-05-12	Arnold Dining	469.5
2021-05-19	Arnold Dining	451.5
2021-05-19	Arnold Dining	451.5
2021-05-23	Arnold Dining	406.6
2021-05-23	Arnold Dining	406.6
2021-05-26	Arnold Dining	435.7
2021-05-26	Arnold Dining	435.7
2021-05-30	Arnold Dining	369.5
2021-05-30	Arnold Dining	369.5
2021-06-06	Arnold Dining	397.7
2021-06-06	Arnold Dining	397.7
2021-06-09	Arnold Dining	378.3
2021-06-09	Arnold Dining	378.3
2021-06-19	Arnold Dining	262.8
2021-06-19	Arnold Dining	262.8
2021-06-23	Arnold Dining	275.6
2021-06-23	Arnold Dining	275.6
2021-07-03	Arnold Dining	265.9
2021-07-03	Arnold Dining	265.9
2021-07-07	Arnold Dining	253.4
2021-07-07	Arnold Dining	253.4
2021-07-10	Arnold Dining	267.5
2021-07-10	Arnold Dining	267.5
2021-07-21	Arnold Dining	309.7
2021-07-21	Arnold Dining	309.7
2021-07-24	Arnold Dining	244.5
2021-07-24	Arnold Dining	244.5
2021-07-31	Arnold Dining	306.5
2021-07-31	Arnold Dining	306.5
2021-08-04	Arnold Dining	342.2
2021-08-04	Arnold Dining	342.2
2021-08-08	Arnold Dining	295.9
2021-08-08	Arnold Dining	295.8
2021-08-11	Arnold Dining	310
2021-08-11	Arnold Dining	310
2021-08-14	Arnold Dining	309.6
2021-08-14	Arnold Dining	309.6
2021-08-18	Arnold Dining	307
2021-08-18	Arnold Dining	307
2021-08-21	Arnold Dining	322.7
2021-08-21	Arnold Dining	322.7
2021-08-25	Arnold Dining	285.8
2021-08-25	Arnold Dining	285.8
2021-08-28	Arnold Dining	315.8
2021-08-28	Arnold Dining	315.8
2021-09-01	Arnold Dining	368.2
2021-09-01	Arnold Dining	368.2
2021-09-08	Arnold Dining	349.8
2021-09-08	Arnold Dining	349.8
2021-09-11	Arnold Dining	321.6
2021-09-11	Arnold Dining	321.6
2021-09-15	Arnold Dining	294.4
2021-09-15	Arnold Dining	294.4
2021-09-18	Arnold Dining	267.8
2021-09-18	Arnold Dining	267.8
2021-09-22	Arnold Dining	627.6
2021-09-22	Arnold Dining	627.6
2021-09-25	Arnold Dining	627.7
2021-09-25	Arnold Dining	627.7
2021-09-29	Arnold Dining	537.3
2021-09-29	Arnold Dining	537.3
2021-10-02	Arnold Dining	596.5
2021-10-02	Arnold Dining	596.5
2021-10-06	Arnold Dining	603.7
2021-10-06	Arnold Dining	603.7
2021-10-09	Arnold Dining	621
2021-10-09	Arnold Dining	621
2021-10-13	Arnold Dining	577.1
2021-10-13	Arnold Dining	577.1
2021-10-16	Arnold Dining	638.9
2021-10-16	Arnold Dining	638.9
2021-10-20	Arnold Dining	621.3
2021-10-20	Arnold Dining	621.3
2021-10-23	Arnold Dining	438.3
2021-10-23	Arnold Dining	438.3
2021-10-27	Arnold Dining	422.6
2021-10-27	Arnold Dining	422.6
2021-11-03	Arnold Dining	638.8
2021-11-03	Arnold Dining	638.8
2021-11-06	Arnold Dining	336
2021-11-06	Arnold Dining	336
2021-11-13	Arnold Dining	381
2021-11-13	Arnold Dining	381
2021-11-17	Arnold Dining	718.7
2021-11-17	Arnold Dining	718.7
2021-11-20	Arnold Dining	926.7
2021-11-20	Arnold Dining	926.7
2021-12-01	Arnold Dining	877.8
2021-12-01	Arnold Dining	877.8
2021-12-04	Arnold Dining	855.7
2021-12-04	Arnold Dining	855.7
2021-12-08	Arnold Dining	639.1
2021-12-08	Arnold Dining	639.1
2022-01-05	Arnold Dining	296
2022-01-05	Arnold Dining	296
2022-01-08	Arnold Dining	468.2
2022-01-08	Arnold Dining	468.2
2022-01-22	Arnold Dining	782.8
2022-01-22	Arnold Dining	782.8
2022-01-26	Arnold Dining	939.7
2022-01-26	Arnold Dining	939.7
2022-01-29	Arnold Dining	978.2
2022-01-29	Arnold Dining	978.2
2022-02-02	Arnold Dining	1343
2022-02-02	Arnold Dining	1343
2022-02-05	Arnold Dining	808.8
2022-02-05	Arnold Dining	808.8
2022-02-09	Arnold Dining	702.4
2022-02-09	Arnold Dining	702.4
2022-02-12	Arnold Dining	711.4
2022-02-12	Arnold Dining	711.4
2022-02-16	Arnold Dining	788.1
2022-02-16	Arnold Dining	788.1
2022-02-19	Arnold Dining	739.9
2022-02-19	Arnold Dining	739.9
2022-02-23	Arnold Dining	879.6
2022-02-23	Arnold Dining	879.6
2022-02-26	Arnold Dining	957.3
2022-02-26	Arnold Dining	957.3
2022-03-02	Arnold Dining	507
2022-03-02	Arnold Dining	507
2022-03-05	Arnold Dining	860.2
2022-03-05	Arnold Dining	860.2
2022-03-09	Arnold Dining	1048
2022-03-09	Arnold Dining	1048
2022-03-12	Arnold Dining	1080
2022-03-12	Arnold Dining	1080
2022-03-16	Arnold Dining	467
2022-03-16	Arnold Dining	467
2022-03-19	Arnold Dining	482
2022-03-19	Arnold Dining	482
2022-03-30	Arnold Dining	774
2022-03-30	Arnold Dining	774
2022-04-06	Arnold Dining	719
2022-04-06	Arnold Dining	719
2022-04-09	Arnold Dining	521
2022-04-09	Arnold Dining	521
2022-04-13	Arnold Dining	530
2022-04-13	Arnold Dining	530
2022-04-16	Arnold Dining	623
2022-04-16	Arnold Dining	623
2022-04-20	Arnold Dining	503
2022-04-20	Arnold Dining	503
2022-04-23	Arnold Dining	531
2022-04-23	Arnold Dining	531
2022-04-27	Arnold Dining	887
2022-04-27	Arnold Dining	887
2022-04-30	Arnold Dining	858
2022-04-30	Arnold Dining	858
2022-05-04	Arnold Dining	804
2022-05-04	Arnold Dining	804
2022-05-11	Arnold Dining	992
2022-05-11	Arnold Dining	992
2022-05-14	Arnold Dining	469
2022-05-14	Arnold Dining	469
2022-05-18	Arnold Dining	532
2022-05-18	Arnold Dining	532
2022-05-25	Arnold Dining	699
2022-05-25	Arnold Dining	699
2022-05-28	Arnold Dining	679
2022-05-28	Arnold Dining	679
2021-04-11	Beth Ray Center	481
2021-04-11	Beth Ray Center	481
2021-04-14	Beth Ray Center	638
2021-04-14	Beth Ray Center	638
2021-04-18	Beth Ray Center	563
2021-04-18	Beth Ray Center	563
2021-04-21	Beth Ray Center	591
2021-04-21	Beth Ray Center	591
2021-04-25	Beth Ray Center	298
2021-04-25	Beth Ray Center	298
2021-04-28	Beth Ray Center	752
2021-04-28	Beth Ray Center	752
2021-05-02	Beth Ray Center	592
2021-05-02	Beth Ray Center	592
2021-05-05	Beth Ray Center	797
2021-05-05	Beth Ray Center	797
2021-05-09	Beth Ray Center	682
2021-05-09	Beth Ray Center	682
2021-05-12	Beth Ray Center	520.3
2021-05-12	Beth Ray Center	520.3
2021-05-16	Beth Ray Center	452.9
2021-05-16	Beth Ray Center	452.9
2021-05-19	Beth Ray Center	445.1
2021-05-19	Beth Ray Center	445.1
2021-05-26	Beth Ray Center	389.7
2021-05-26	Beth Ray Center	389.7
2021-05-30	Beth Ray Center	342.7
2021-05-30	Beth Ray Center	342.7
2021-06-06	Beth Ray Center	360.7
2021-06-06	Beth Ray Center	360.7
2021-06-09	Beth Ray Center	230.2
2021-06-09	Beth Ray Center	230.2
2021-06-12	Beth Ray Center	304.1
2021-06-12	Beth Ray Center	304.1
2021-06-19	Beth Ray Center	204
2021-06-19	Beth Ray Center	204
2021-06-23	Beth Ray Center	251.3
2021-06-23	Beth Ray Center	251.3
2021-07-03	Beth Ray Center	300.2
2021-07-03	Beth Ray Center	300.2
2021-07-07	Beth Ray Center	256.2
2021-07-07	Beth Ray Center	256.2
2021-07-10	Beth Ray Center	271.4
2021-07-10	Beth Ray Center	271.4
2021-07-18	Beth Ray Center	379
2021-07-18	Beth Ray Center	379
2021-07-21	Beth Ray Center	306.9
2021-07-21	Beth Ray Center	306.9
2021-07-28	Beth Ray Center	283.6
2021-07-28	Beth Ray Center	283.6
2021-07-31	Beth Ray Center	286.8
2021-07-31	Beth Ray Center	286.8
2021-08-04	Beth Ray Center	313.5
2021-08-04	Beth Ray Center	313.5
2021-08-08	Beth Ray Center	225.8
2021-08-08	Beth Ray Center	225.8
2021-08-11	Beth Ray Center	376.4
2021-08-11	Beth Ray Center	376.4
2021-08-14	Beth Ray Center	332.3
2021-08-14	Beth Ray Center	332.3
2021-08-21	Beth Ray Center	364.8
2021-08-21	Beth Ray Center	36.4
2021-08-25	Beth Ray Center	288.2
2021-08-25	Beth Ray Center	288.2
2021-08-28	Beth Ray Center	407.8
2021-08-28	Beth Ray Center	407.8
2021-09-01	Beth Ray Center	132.9
2021-09-01	Beth Ray Center	132.9
2021-09-08	Beth Ray Center	360.6
2021-09-08	Beth Ray Center	360.6
2021-09-11	Beth Ray Center	327.6
2021-09-11	Beth Ray Center	327.6
2021-09-15	Beth Ray Center	378.6
2021-09-15	Beth Ray Center	378.6
2021-09-25	Beth Ray Center	608.7
2021-09-25	Beth Ray Center	608.7
2021-09-29	Beth Ray Center	576.3
2021-09-29	Beth Ray Center	576.3
2021-10-02	Beth Ray Center	587.3
2021-10-02	Beth Ray Center	587.3
2021-10-06	Beth Ray Center	662.4
2021-10-06	Beth Ray Center	662.4
2021-10-09	Beth Ray Center	668.4
2021-10-09	Beth Ray Center	668.4
2021-10-13	Beth Ray Center	596.8
2021-10-13	Beth Ray Center	596.8
2021-10-16	Beth Ray Center	744.3
2021-10-16	Beth Ray Center	744.3
2021-10-20	Beth Ray Center	545.1
2021-10-20	Beth Ray Center	545.1
2021-10-23	Beth Ray Center	410.4
2021-10-23	Beth Ray Center	410.4
2021-10-27	Beth Ray Center	425.5
2021-10-27	Beth Ray Center	425.5
2021-10-30	Beth Ray Center	421.7
2021-10-30	Beth Ray Center	421.7
2021-11-03	Beth Ray Center	490.9
2021-11-03	Beth Ray Center	490.9
2021-11-06	Beth Ray Center	505.9
2021-11-06	Beth Ray Center	505.9
2021-11-13	Beth Ray Center	497.7
2021-11-13	Beth Ray Center	497.7
2021-11-17	Beth Ray Center	611.1
2021-11-17	Beth Ray Center	611.1
2021-11-20	Beth Ray Center	893
2021-11-20	Beth Ray Center	893
2021-12-04	Beth Ray Center	666.4
2021-12-04	Beth Ray Center	666.4
2021-12-08	Beth Ray Center	807.4
2021-12-08	Beth Ray Center	807.4
2022-01-05	Beth Ray Center	306
2022-01-05	Beth Ray Center	306
2022-01-08	Beth Ray Center	540.1
2022-01-08	Beth Ray Center	540.1
2022-01-15	Beth Ray Center	631.5
2022-01-15	Beth Ray Center	631.5
2022-01-22	Beth Ray Center	854.9
2022-01-22	Beth Ray Center	854.9
2022-01-26	Beth Ray Center	985.9
2022-01-26	Beth Ray Center	985.9
2022-01-29	Beth Ray Center	932.9
2022-01-29	Beth Ray Center	932.9
2022-02-02	Beth Ray Center	1257
2022-02-02	Beth Ray Center	1257
2022-02-05	Beth Ray Center	690.8
2022-02-05	Beth Ray Center	690.8
2022-02-09	Beth Ray Center	772.8
2022-02-09	Beth Ray Center	772.8
2022-02-12	Beth Ray Center	717
2022-02-12	Beth Ray Center	717
2022-02-16	Beth Ray Center	700.5
2022-02-16	Beth Ray Center	700.5
2022-02-19	Beth Ray Center	731.4
2022-02-19	Beth Ray Center	731.4
2022-02-23	Beth Ray Center	725.2
2022-02-23	Beth Ray Center	725.2
2022-03-02	Beth Ray Center	476.3
2022-03-02	Beth Ray Center	476.3
2022-03-09	Beth Ray Center	878.8
2022-03-09	Beth Ray Center	878.8
2022-03-12	Beth Ray Center	755.2
2022-03-12	Beth Ray Center	755.2
2022-03-16	Beth Ray Center	482
2022-03-16	Beth Ray Center	482
2022-03-19	Beth Ray Center	469
2022-03-19	Beth Ray Center	469
2022-03-25	Beth Ray Center	568.9
2022-03-25	Beth Ray Center	568.9
2022-03-30	Beth Ray Center	734
2022-03-30	Beth Ray Center	734
2022-04-02	Beth Ray Center	623
2022-04-02	Beth Ray Center	623
2022-04-06	Beth Ray Center	543
2022-04-06	Beth Ray Center	543
2022-04-13	Beth Ray Center	485
2022-04-13	Beth Ray Center	485
2022-04-16	Beth Ray Center	520
2022-04-16	Beth Ray Center	520
2022-04-20	Beth Ray Center	523
2022-04-20	Beth Ray Center	523
2022-04-23	Beth Ray Center	571
2022-04-23	Beth Ray Center	571
2022-04-27	Beth Ray Center	667
2022-04-27	Beth Ray Center	667
2022-04-30	Beth Ray Center	617
2022-04-30	Beth Ray Center	617
2022-05-04	Beth Ray Center	728
2022-05-04	Beth Ray Center	728
2022-05-07	Beth Ray Center	334
2022-05-07	Beth Ray Center	334
2022-05-11	Beth Ray Center	848
2022-05-11	Beth Ray Center	848
2022-05-14	Beth Ray Center	418
2022-05-14	Beth Ray Center	418
2022-05-18	Beth Ray Center	531
2022-05-18	Beth Ray Center	531
2022-05-25	Beth Ray Center	598
2022-05-25	Beth Ray Center	598
2022-05-28	Beth Ray Center	559
2022-05-28	Beth Ray Center	559
2021-04-11	Callahan	1182
2021-04-11	Callahan	1182
2021-04-14	Callahan	1233
2021-04-14	Callahan	1233
2021-04-18	Callahan	1797
2021-04-18	Callahan	1797
2021-04-21	Callahan	1226
2021-04-21	Callahan	1226
2021-04-25	Callahan	1048
2021-04-25	Callahan	1048
2021-05-02	Callahan	1862
2021-05-02	Callahan	1862
2021-05-05	Callahan	1908
2021-05-05	Callahan	1908
2021-05-09	Callahan	621
2021-05-09	Callahan	621
2021-05-12	Callahan	1156
2021-05-12	Callahan	1156
2021-05-16	Callahan	1158
2021-05-16	Callahan	1158
2021-05-19	Callahan	1065
2021-05-19	Callahan	1065
2021-05-23	Callahan	1266
2021-05-23	Callahan	1266
2021-05-26	Callahan	1289
2021-05-26	Callahan	1289
2021-05-30	Callahan	603
2021-05-30	Callahan	603
2021-06-06	Callahan	1454
2021-06-06	Callahan	1454
2021-06-09	Callahan	652.2
2021-06-09	Callahan	652.2
2021-09-11	Callahan	1419
2021-09-11	Callahan	1419
2021-09-15	Callahan	1822
2021-09-15	Callahan	1822
2021-09-18	Callahan	1132
2021-09-18	Callahan	1132
2021-09-22	Callahan	1435
2021-09-22	Callahan	1435
2021-09-25	Callahan	1384
2021-09-25	Callahan	1384
2021-09-29	Callahan	1135
2021-09-29	Callahan	1135
2021-10-02	Callahan	1223
2021-10-02	Callahan	1223
2021-10-06	Callahan	410.6
2021-10-06	Callahan	410.6
2021-10-09	Callahan	1234
2021-10-09	Callahan	1234
2021-10-13	Callahan	1319
2021-10-13	Callahan	1319
2021-10-16	Callahan	1383
2021-10-16	Callahan	1383
2021-10-20	Callahan	1432
2021-10-20	Callahan	1432
2021-10-23	Callahan	1465
2021-10-23	Callahan	1465
2021-10-27	Callahan	1157
2021-10-27	Callahan	1157
2021-10-30	Callahan	996.5
2021-10-30	Callahan	996.5
2021-11-03	Callahan	1224
2021-11-03	Callahan	1224
2021-11-06	Callahan	1116
2021-11-06	Callahan	1116
2021-11-17	Callahan	1066
2021-11-17	Callahan	1066
2021-11-20	Callahan	2094
2021-11-20	Callahan	2094
2021-12-01	Callahan	1106
2021-12-01	Callahan	1106
2021-12-08	Callahan	1166
2021-12-08	Callahan	1166
2022-01-05	Callahan	864.9
2022-01-05	Callahan	864.9
2022-01-08	Callahan	1060
2022-01-08	Callahan	1060
2022-01-15	Callahan	1225
2022-01-15	Callahan	1225
2022-01-22	Callahan	2436
2022-01-22	Callahan	2436
2022-01-26	Callahan	1716
2022-01-26	Callahan	1716
2022-01-29	Callahan	1491
2022-01-29	Callahan	1491
2022-02-02	Callahan	2112
2022-02-02	Callahan	2112
2022-02-05	Callahan	1578
2022-02-05	Callahan	1578
2022-02-09	Callahan	1340
2022-02-09	Callahan	1340
2022-02-12	Callahan	1453
2022-02-12	Callahan	1453
2022-02-16	Callahan	1180
2022-02-16	Callahan	1180
2022-02-19	Callahan	1156
2022-02-19	Callahan	1156
2022-02-23	Callahan	1234
2022-02-23	Callahan	1234
2022-02-26	Callahan	1483
2022-02-26	Callahan	1483
2022-03-02	Callahan	1298
2022-03-02	Callahan	1298
2022-03-05	Callahan	1725
2022-03-05	Callahan	1725
2022-03-09	Callahan	1811
2022-03-09	Callahan	1811
2022-03-12	Callahan	1873
2022-03-12	Callahan	1873
2022-03-16	Callahan	1593
2022-03-16	Callahan	1593
2022-03-19	Callahan	1028
2022-03-19	Callahan	1028
2022-03-30	Callahan	1552
2022-03-30	Callahan	1552
2022-04-02	Callahan	1289
2022-04-02	Callahan	1289
2022-04-09	Callahan	1859
2022-04-09	Callahan	1859
2022-04-13	Callahan	967
2022-04-13	Callahan	967
2022-04-16	Callahan	1015
2022-04-16	Callahan	1015
2022-04-20	Callahan	1043
2022-04-20	Callahan	1043
2022-04-23	Callahan	1222
2022-04-23	Callahan	1222
2022-04-27	Callahan	1587
2022-04-27	Callahan	1587
2022-04-30	Callahan	1146
2022-04-30	Callahan	1146
2022-05-04	Callahan	1400
2022-05-04	Callahan	1400
2022-05-07	Callahan	1078
2022-05-07	Callahan	1078
2022-05-11	Callahan	1503
2022-05-11	Callahan	1503
2022-05-14	Callahan	1012
2022-05-14	Callahan	1012
2022-05-18	Callahan	1094
2022-05-18	Callahan	1094
2022-05-25	Callahan	941
2022-05-25	Callahan	941
2022-05-28	Callahan	919
2022-05-28	Callahan	919
2021-04-11	East Campus	534
2021-04-11	East Campus	534
2021-04-14	East Campus	689
2021-04-14	East Campus	689
2021-04-21	East Campus	654
2021-04-21	East Campus	654
2021-04-25	East Campus	581
2021-04-25	East Campus	581
2021-04-28	East Campus	836
2021-04-28	East Campus	836
2021-05-02	East Campus	653
2021-05-02	East Campus	653
2021-05-05	East Campus	767
2021-05-05	East Campus	767
2021-05-09	East Campus	718
2021-05-09	East Campus	718
2021-05-12	East Campus	527.6
2021-05-12	East Campus	527.6
2021-05-16	East Campus	433.7
2021-05-16	East Campus	433.7
2021-05-19	East Campus	474.7
2021-05-19	East Campus	474.7
2021-05-23	East Campus	483.1
2021-05-23	East Campus	483.1
2021-05-26	East Campus	474.5
2021-05-26	East Campus	474.5
2021-05-30	East Campus	402.4
2021-05-30	East Campus	402.4
2021-06-02	East Campus	313.5
2021-06-02	East Campus	313.5
2021-06-06	East Campus	434.8
2021-06-06	East Campus	434.8
2021-06-09	East Campus	419.5
2021-06-09	East Campus	419.5
2021-06-12	East Campus	361
2021-06-12	East Campus	361
2021-06-19	East Campus	284.2
2021-06-19	East Campus	284.2
2021-06-23	East Campus	350.1
2021-06-23	East Campus	350.1
2021-07-03	East Campus	388.5
2021-07-03	East Campus	388.5
2021-07-07	East Campus	283.1
2021-07-07	East Campus	283.1
2021-07-21	East Campus	338.9
2021-07-21	East Campus	338.9
2021-07-28	East Campus	415.5
2021-07-28	East Campus	415.5
2021-07-31	East Campus	261.1
2021-07-31	East Campus	261.1
2021-08-04	East Campus	256.5
2021-08-04	East Campus	256.5
2021-08-08	East Campus	333
2021-08-08	East Campus	333
2021-08-14	East Campus	361.5
2021-08-14	East Campus	361.5
2021-08-18	East Campus	277.4
2021-08-18	East Campus	277.4
2021-08-21	East Campus	365.8
2021-08-21	East Campus	365.8
2021-08-25	East Campus	289.1
2021-08-25	East Campus	289.1
2021-08-28	East Campus	339.3
2021-08-28	East Campus	339.3
2021-09-01	East Campus	339.3
2021-09-01	East Campus	339.3
2021-09-08	East Campus	348.2
2021-09-08	East Campus	348.2
2021-09-29	East Campus	582.1
2021-09-29	East Campus	582.1
2021-10-06	East Campus	402.5
2021-10-06	East Campus	402.5
2021-10-13	East Campus	662.5
2021-10-13	East Campus	662.5
2021-10-16	East Campus	793.4
2021-10-16	East Campus	793.4
2021-10-20	East Campus	803.9
2021-10-20	East Campus	803.9
2021-10-23	East Campus	590
2021-10-23	East Campus	590
2021-10-27	East Campus	605.5
2021-10-27	East Campus	605.5
2021-10-30	East Campus	600.8
2021-10-30	East Campus	600.8
2021-11-03	East Campus	711.4
2021-11-03	East Campus	711.4
2021-11-06	East Campus	433.7
2021-11-06	East Campus	433.7
2021-11-13	East Campus	530
2021-11-13	East Campus	530
2021-11-17	East Campus	667.6
2021-11-17	East Campus	667.6
2021-11-20	East Campus	785.1
2021-11-20	East Campus	785.1
2021-12-01	East Campus	939.1
2021-12-01	East Campus	939.1
2021-12-04	East Campus	714.6
2021-12-04	East Campus	714.6
2021-12-08	East Campus	597.1
2021-12-08	East Campus	597.1
2021-12-18	East Campus	400.8
2021-12-18	East Campus	400.8
2021-12-22	East Campus	254.4
2021-12-22	East Campus	254.4
2021-12-29	East Campus	203
2021-12-29	East Campus	203
2022-01-05	East Campus	380.5
2022-01-05	East Campus	380.5
2022-01-08	East Campus	475.9
2022-01-08	East Campus	475.9
2022-01-15	East Campus	754.9
2022-01-15	East Campus	754.9
2022-01-22	East Campus	977.8
2022-01-22	East Campus	977.8
2022-01-26	East Campus	891.4
2022-01-26	East Campus	891.4
2022-01-29	East Campus	1127
2022-01-29	East Campus	1127
2022-02-02	East Campus	1064
2022-02-02	East Campus	1064
2022-02-05	East Campus	636.9
2022-02-05	East Campus	636.9
2022-02-09	East Campus	742.2
2022-02-09	East Campus	742.2
2022-02-12	East Campus	696.6
2022-02-12	East Campus	696.6
2022-02-16	East Campus	792.6
2022-02-16	East Campus	792.6
2022-02-19	East Campus	746.1
2022-02-19	East Campus	746.1
2022-02-23	East Campus	757.9
2022-02-23	East Campus	757.9
2022-02-26	East Campus	822
2022-02-26	East Campus	822
2022-03-05	East Campus	832.5
2022-03-05	East Campus	832.5
2022-03-09	East Campus	1057
2022-03-09	East Campus	1057
2022-03-12	East Campus	913.5
2022-03-12	East Campus	913.5
2022-03-16	East Campus	920.5
2022-03-16	East Campus	920.5
2022-03-19	East Campus	417
2022-03-19	East Campus	417
2022-03-22	East Campus	300
2022-03-22	East Campus	300
2022-03-25	East Campus	636.8
2022-03-25	East Campus	636.8
2022-04-02	East Campus	590
2022-04-02	East Campus	590
2022-04-09	East Campus	681
2022-04-09	East Campus	681
2022-04-13	East Campus	557
2022-04-13	East Campus	557
2022-04-16	East Campus	556
2022-04-16	East Campus	556
2022-04-20	East Campus	497
2022-04-20	East Campus	497
2022-05-04	East Campus	1129
2022-05-04	East Campus	1129
2022-05-11	East Campus	804
2022-05-11	East Campus	804
2022-05-14	East Campus	399
2022-05-14	East Campus	399
2022-05-18	East Campus	646
2022-05-18	East Campus	646
2022-05-25	East Campus	659
2022-05-25	East Campus	659
2022-05-28	East Campus	473
2022-05-28	East Campus	473
2021-09-11	East Campus	370.8
2021-09-11	East Campus	370.8
2021-09-15	East Campus	398
2021-09-15	East Campus	398
2021-09-18	East Campus	360.4
2021-09-18	East Campus	360.4
2021-09-22	East Campus	845.4
2021-09-22	East Campus	845.4
2021-09-25	East Campus	803.7
2021-09-25	East Campus	803.7
2021-04-11	Goss Stadium	151.1
2021-04-11	Goss Stadium	151.1
2021-04-14	Goss Stadium	169.5
2021-04-14	Goss Stadium	169.5
2021-04-18	Goss Stadium	160.4
2021-04-18	Goss Stadium	160.4
2021-04-21	Goss Stadium	157.8
2021-04-21	Goss Stadium	157.8
2021-04-25	Goss Stadium	115
2021-04-25	Goss Stadium	115
2021-04-28	Goss Stadium	168
2021-04-28	Goss Stadium	168
2021-05-02	Goss Stadium	176
2021-05-02	Goss Stadium	176
2021-05-05	Goss Stadium	181
2021-05-05	Goss Stadium	181
2021-05-09	Goss Stadium	167
2021-05-09	Goss Stadium	167
2021-05-12	Goss Stadium	105.8
2021-05-12	Goss Stadium	105.8
2021-05-16	Goss Stadium	106.9
2021-05-16	Goss Stadium	106.9
2021-05-19	Goss Stadium	103
2021-05-19	Goss Stadium	103
2021-05-23	Goss Stadium	97.09
2021-05-23	Goss Stadium	97.09
2021-05-26	Goss Stadium	106.4
2021-05-26	Goss Stadium	106.4
2021-05-30	Goss Stadium	108.7
2021-05-30	Goss Stadium	108.7
2021-06-06	Goss Stadium	108.1
2021-06-06	Goss Stadium	108.1
2021-06-09	Goss Stadium	107.2
2021-06-09	Goss Stadium	107.2
2021-06-12	Goss Stadium	106.8
2021-06-12	Goss Stadium	106.8
2021-06-23	Goss Stadium	104
2021-06-23	Goss Stadium	104
2021-07-03	Goss Stadium	104.7
2021-07-03	Goss Stadium	104.7
2021-07-07	Goss Stadium	101.9
2021-07-07	Goss Stadium	101.9
2021-07-10	Goss Stadium	94.07
2021-07-10	Goss Stadium	94.07
2021-07-21	Goss Stadium	105.9
2021-07-21	Goss Stadium	105.9
2021-07-28	Goss Stadium	106.6
2021-07-28	Goss Stadium	106.6
2021-07-31	Goss Stadium	104.4
2021-07-31	Goss Stadium	104.4
2021-08-04	Goss Stadium	100.7
2021-08-04	Goss Stadium	100.7
2021-08-08	Goss Stadium	114.5
2021-08-08	Goss Stadium	114.5
2021-08-11	Goss Stadium	108.2
2021-08-11	Goss Stadium	108.2
2021-08-14	Goss Stadium	109.6
2021-08-14	Goss Stadium	109.6
2021-08-21	Goss Stadium	111.3
2021-08-21	Goss Stadium	111.3
2021-08-25	Goss Stadium	106.5
2021-08-25	Goss Stadium	106.5
2021-08-28	Goss Stadium	109.7
2021-08-28	Goss Stadium	109.7
2021-09-01	Goss Stadium	112
2021-09-01	Goss Stadium	112
2021-09-08	Goss Stadium	106.4
2021-09-08	Goss Stadium	106.4
2021-09-11	Goss Stadium	106.2
2021-09-11	Goss Stadium	106.2
2021-09-15	Goss Stadium	105.9
2021-09-15	Goss Stadium	105.9
2021-09-18	Goss Stadium	106.9
2021-09-18	Goss Stadium	106.9
2021-09-25	Goss Stadium	102.3
2021-09-25	Goss Stadium	102.3
2021-09-29	Goss Stadium	106.5
2021-09-29	Goss Stadium	106.5
2021-10-02	Goss Stadium	113.9
2021-10-02	Goss Stadium	113.9
2021-10-06	Goss Stadium	114.5
2021-10-06	Goss Stadium	114.5
2021-10-09	Goss Stadium	119.9
2021-10-09	Goss Stadium	119.9
2021-10-16	Goss Stadium	120.2
2021-10-16	Goss Stadium	120.2
2021-10-20	Goss Stadium	112.5
2021-10-20	Goss Stadium	112.5
2021-10-27	Goss Stadium	110.4
2021-10-27	Goss Stadium	110.4
2021-10-30	Goss Stadium	109.1
2021-10-30	Goss Stadium	109.1
2021-11-06	Goss Stadium	114.4
2021-11-06	Goss Stadium	114.4
2021-11-13	Goss Stadium	114.5
2021-11-13	Goss Stadium	114.5
2021-11-17	Goss Stadium	115
2021-11-17	Goss Stadium	115
2021-11-20	Goss Stadium	153.3
2021-11-20	Goss Stadium	153.3
2021-12-01	Goss Stadium	113.9
2021-12-01	Goss Stadium	113.9
2021-12-04	Goss Stadium	123.7
2021-12-04	Goss Stadium	123.7
2021-12-08	Goss Stadium	147.4
2022-01-12	Goss Stadium	159.9
2022-01-12	Goss Stadium	159.9
2022-01-19	Goss Stadium	156.6
2022-01-19	Goss Stadium	156.6
2022-01-26	Goss Stadium	181.9
2022-01-26	Goss Stadium	181.9
2022-01-29	Goss Stadium	181.6
2022-01-29	Goss Stadium	181.6
2022-02-02	Goss Stadium	1871
2022-02-02	Goss Stadium	1871
2022-02-05	Goss Stadium	115.5
2022-02-05	Goss Stadium	115.5
2022-02-09	Goss Stadium	120.5
2022-02-09	Goss Stadium	120.5
2022-02-12	Goss Stadium	121.4
2022-02-12	Goss Stadium	121.4
2022-02-19	Goss Stadium	129.4
2022-02-19	Goss Stadium	129.4
2022-02-23	Goss Stadium	142.9
2022-02-23	Goss Stadium	142.9
2022-02-26	Goss Stadium	140.6
2022-02-26	Goss Stadium	140.6
2022-03-02	Goss Stadium	178.5
2022-03-02	Goss Stadium	178.5
2022-03-05	Goss Stadium	180.6
2022-03-05	Goss Stadium	180.6
2022-03-09	Goss Stadium	186.7
2022-03-09	Goss Stadium	186.7
2022-03-19	Goss Stadium	114
2022-03-19	Goss Stadium	114
2022-04-16	Goss Stadium	131.4
2022-04-16	Goss Stadium	131.4
2022-04-23	Goss Stadium	143.4
2022-04-23	Goss Stadium	143.4
2022-04-30	Goss Stadium	146.5
2022-04-30	Goss Stadium	146.5
2022-05-04	Goss Stadium	158.9
2022-05-04	Goss Stadium	158.9
2022-05-07	Goss Stadium	158.2
2022-05-07	Goss Stadium	158.2
2022-05-11	Goss Stadium	160.1
2022-05-11	Goss Stadium	160.1
2022-05-14	Goss Stadium	154.7
2022-05-14	Goss Stadium	154.7
2022-05-28	Goss Stadium	112.9
2022-05-28	Goss Stadium	112.9
2021-04-11	Finley	572
2021-04-11	Finley	572
2021-04-14	Finley	655
2021-04-14	Finley	655
2021-04-18	Finley	541
2021-04-18	Finley	541
2021-04-21	Finley	651
2021-04-21	Finley	651
2021-04-25	Finley	520
2021-04-25	Finley	520
2021-04-28	Finley	811
2021-04-28	Finley	811
2021-05-02	Finley	557
2021-05-02	Finley	557
2021-05-05	Finley	755
2021-05-05	Finley	755
2021-05-09	Finley	652
2021-05-09	Finley	652
2021-05-12	Finley	513.3
2021-05-12	Finley	513.3
2021-05-19	Finley	492.2
2021-05-19	Finley	492.2
2021-05-23	Finley	449.7
2021-05-23	Finley	449.7
2021-05-26	Finley	450.1
2021-05-26	Finley	450.1
2021-05-30	Finley	238.5
2021-05-30	Finley	238.5
2021-06-06	Finley	735.2
2021-06-06	Finley	735.2
2021-06-09	Finley	422.5
2021-06-09	Finley	422.5
2021-06-12	Finley	277.6
2021-06-12	Finley	277.6
2021-06-19	Finley	236.8
2021-06-19	Finley	236.8
2021-06-23	Finley	564.7
2021-06-23	Finley	564.7
2021-07-03	Finley	294
2021-07-03	Finley	294
2021-07-07	Finley	204.1
2021-07-07	Finley	204.1
2021-07-21	Finley	310.9
2021-07-21	Finley	310.9
2021-07-28	Finley	233.5
2021-07-28	Finley	233.5
2021-07-31	Finley	267.1
2021-07-31	Finley	267.1
2021-08-04	Finley	331.2
2021-08-04	Finley	331.2
2021-08-08	Finley	251.4
2021-08-08	Finley	251.4
2021-08-11	Finley	310.2
2021-08-11	Finley	310.2
2021-08-14	Finley	311.4
2021-08-14	Finley	311.4
2021-08-18	Finley	242.4
2021-08-18	Finley	242.4
2021-08-21	Finley	377.2
2021-08-21	Finley	377.2
2021-08-25	Finley	179.5
2021-08-25	Finley	179.5
2021-08-28	Finley	285.9
2021-08-28	Finley	285.9
2021-09-01	Finley	260.4
2021-09-01	Finley	260.4
2021-09-08	Finley	458.1
2021-09-08	Finley	458.1
2021-09-11	Finley	466.4
2021-09-11	Finley	466.4
2021-09-15	Finley	1191
2021-09-15	Finley	1191
2021-09-18	Finley	288.7
2021-09-18	Finley	288.7
2021-09-29	Finley	723.9
2021-09-29	Finley	723.9
2021-10-02	Finley	808.4
2021-10-02	Finley	808.4
2021-10-06	Finley	666.1
2021-10-06	Finley	666.1
2021-10-09	Finley	803.5
2021-10-09	Finley	803.5
2021-10-13	Finley	538.6
2021-10-13	Finley	538.6
2021-10-16	Finley	794.7
2021-10-16	Finley	794.7
2021-10-20	Finley	611.9
2021-10-20	Finley	611.9
2021-10-23	Finley	498.8
2021-10-23	Finley	498.8
2021-10-27	Finley	448.1
2021-10-27	Finley	448.1
2021-10-30	Finley	525.4
2021-10-30	Finley	525.4
2021-11-03	Finley	557.1
2021-11-03	Finley	557.1
2021-11-06	Finley	386.8
2021-11-06	Finley	386.8
2021-11-13	Finley	405.8
2021-11-13	Finley	405.8
2021-11-17	Finley	593.9
2021-11-17	Finley	593.9
2021-11-20	Finley	911.7
2021-11-20	Finley	911.7
2021-12-01	Finley	888.8
2021-12-01	Finley	888.8
2021-12-04	Finley	1353
2021-12-04	Finley	1353
2021-12-08	Finley	700
2021-12-08	Finley	700
2022-01-05	Finley	341.3
2022-01-05	Finley	341.3
2022-01-08	Finley	383.8
2022-01-08	Finley	383.8
2022-01-15	Finley	746
2022-01-15	Finley	746
2022-01-19	Finley	807.2
2022-01-19	Finley	807.2
2022-01-22	Finley	828.8
2022-01-22	Finley	828.8
2022-01-26	Finley	838.8
2022-01-26	Finley	838.8
2022-01-29	Finley	940.1
2022-01-29	Finley	940.1
2022-02-02	Finley	1121
2022-02-02	Finley	1121
2022-02-05	Finley	729.9
2022-02-05	Finley	729.9
2022-02-09	Finley	754.1
2022-02-09	Finley	754.1
2022-02-16	Finley	839.4
2022-02-16	Finley	839.4
2022-02-19	Finley	759
2022-02-19	Finley	759
2022-02-23	Finley	791.6
2022-02-23	Finley	791.6
2022-02-26	Finley	843.5
2022-02-26	Finley	843.5
2022-03-02	Finley	566.2
2022-03-02	Finley	566.2
2022-03-05	Finley	807.2
2022-03-05	Finley	807.2
2022-03-09	Finley	1076
2022-03-09	Finley	1076
2022-03-12	Finley	881.1
2022-03-12	Finley	881.1
2022-03-19	Finley	342
2022-03-19	Finley	342
2022-03-30	Finley	589
2022-03-30	Finley	589
2022-04-06	Finley	612
2022-04-06	Finley	612
2022-04-09	Finley	602
2022-04-09	Finley	602
2022-04-13	Finley	428
2022-04-13	Finley	428
2022-04-16	Finley	552
2022-04-16	Finley	552
2022-04-20	Finley	514
2022-04-20	Finley	514
2022-04-23	Finley	659
2022-04-23	Finley	659
2022-04-27	Finley	889
2022-04-27	Finley	889
2022-04-30	Finley	445
2022-04-30	Finley	445
2022-05-04	Finley	707
2022-05-04	Finley	707
2022-05-07	Finley	575
2022-05-07	Finley	575
2022-05-11	Finley	849
2022-05-11	Finley	849
2022-05-14	Finley	665
2022-05-14	Finley	665
2022-05-18	Finley	626
2022-05-18	Finley	626
2022-05-25	Finley	708
2022-05-25	Finley	708
2022-05-28	Finley	633
2022-05-28	Finley	633
2021-04-11	Gem	447
2021-04-11	Gem	447
2021-04-14	Gem	302
2021-04-14	Gem	302
2021-04-18	Gem	414
2021-04-18	Gem	414
2021-04-21	Gem	457
2021-04-21	Gem	457
2021-04-25	Gem	594
2021-04-25	Gem	594
2021-04-28	Gem	427
2021-04-28	Gem	427
2021-05-02	Gem	417
2021-05-02	Gem	417
2021-05-05	Gem	459
2021-05-05	Gem	459
2021-05-09	Gem	436
2021-05-09	Gem	436
2021-05-12	Gem	291.7
2021-05-12	Gem	291.7
2021-05-16	Gem	275.5
2021-05-16	Gem	275.5
2021-05-19	Gem	178.9
2021-05-19	Gem	178.9
2021-05-23	Gem	258.8
2021-05-23	Gem	258.8
2021-05-26	Gem	278.5
2021-05-26	Gem	278.5
2021-05-30	Gem	258
2021-05-30	Gem	258
2021-06-06	Gem	235
2021-06-06	Gem	235
2021-06-09	Gem	245.3
2021-06-09	Gem	245.3
2021-09-11	Gem	262.3
2021-09-11	Gem	262.3
2021-09-15	Gem	452.4
2021-09-15	Gem	452.4
2021-09-18	Gem	354.2
2021-09-18	Gem	354.2
2021-09-22	Gem	321.5
2021-09-22	Gem	321.5
2021-09-25	Gem	394.6
2021-09-25	Gem	394.6
2021-09-29	Gem	404.8
2021-09-29	Gem	404.8
2021-10-02	Gem	412.1
2021-10-02	Gem	412.1
2021-10-06	Gem	648
2021-10-06	Gem	648
2021-10-13	Gem	511.7
2021-10-13	Gem	511.7
2021-10-16	Gem	578.4
2021-10-16	Gem	578.4
2021-10-20	Gem	573.4
2021-10-20	Gem	573.4
2021-10-27	Gem	545.4
2021-10-27	Gem	545.4
2021-10-30	Gem	615.3
2021-10-30	Gem	615.3
2021-11-03	Gem	531.3
2021-11-03	Gem	531.3
2021-11-06	Gem	484.8
2021-11-06	Gem	484.8
2021-11-13	Gem	618.8
2021-11-13	Gem	618.8
2021-11-17	Gem	634.2
2021-11-17	Gem	634.2
2021-11-20	Gem	872.1
2021-11-20	Gem	872.1
2021-12-01	Gem	637.9
2021-12-01	Gem	637.9
2021-12-08	Gem	596.2
2021-12-08	Gem	596.2
2022-01-05	Gem	310.6
2022-01-05	Gem	310.6
2022-01-08	Gem	404.8
2022-01-08	Gem	404.8
2022-01-12	Gem	687
2022-01-12	Gem	687
2022-01-15	Gem	695.7
2022-01-15	Gem	695.7
2022-01-19	Gem	902.2
2022-01-19	Gem	902.2
2022-01-22	Gem	921.4
2022-01-22	Gem	921.4
2022-01-26	Gem	1070
2022-01-26	Gem	1070
2022-01-29	Gem	860.8
2022-01-29	Gem	860.8
2022-02-02	Gem	887.3
2022-02-02	Gem	887.3
2022-02-05	Gem	340.7
2022-02-05	Gem	340.7
2022-02-09	Gem	523.1
2022-02-09	Gem	523.1
2022-02-12	Gem	500.8
2022-02-12	Gem	500.8
2022-02-16	Gem	479.4
2022-02-16	Gem	479.4
2022-02-19	Gem	389
2022-02-19	Gem	389
2022-02-23	Gem	424.1
2022-02-23	Gem	424.1
2022-02-26	Gem	766.9
2022-02-26	Gem	766.9
2022-03-05	Gem	877.1
2022-03-05	Gem	877.1
2022-03-09	Gem	960.4
2022-03-09	Gem	960.4
2022-03-12	Gem	783.3
2022-03-12	Gem	783.3
2022-03-16	Gem	554
2022-03-16	Gem	554
2022-03-19	Gem	460
2022-03-19	Gem	460
2022-03-30	Gem	593
2022-03-30	Gem	593
2022-04-02	Gem	521
2022-04-02	Gem	521
2022-04-06	Gem	459
2022-04-06	Gem	459
2022-04-09	Gem	758
2022-04-09	Gem	758
2022-04-16	Gem	657
2022-04-16	Gem	657
2022-04-20	Gem	426
2022-04-20	Gem	426
2022-04-23	Gem	502
2022-04-23	Gem	502
2022-04-27	Gem	461
2022-04-27	Gem	461
2022-04-30	Gem	562
2022-04-30	Gem	562
2022-05-04	Gem	690
2022-05-04	Gem	690
2022-05-11	Gem	702
2022-05-11	Gem	702
2022-05-14	Gem	648
2022-05-14	Gem	648
2022-05-18	Gem	462
2022-05-18	Gem	462
2022-05-25	Gem	471
2022-05-25	Gem	471
2022-05-28	Gem	339
2022-05-28	Gem	339
2021-04-11	Halsell	343
2021-04-11	Halsell	343
2021-04-18	Halsell	505
2021-04-18	Halsell	505
2021-04-21	Halsell	634
2021-04-21	Halsell	634
2021-04-25	Halsell	207
2021-04-25	Halsell	207
2021-04-28	Halsell	697
2021-04-28	Halsell	697
2021-05-02	Halsell	415
2021-05-02	Halsell	415
2021-05-05	Halsell	643
2021-05-05	Halsell	643
2021-05-12	Halsell	404.6
2021-05-12	Halsell	404.6
2021-05-19	Halsell	454.3
2021-05-19	Halsell	454.3
2021-05-23	Halsell	282.7
2021-05-23	Halsell	282.7
2021-05-26	Halsell	405.4
2021-05-26	Halsell	405.4
2021-05-30	Halsell	300.3
2021-05-30	Halsell	300.3
2021-06-06	Halsell	252.5
2021-06-06	Halsell	252.5
2021-06-09	Halsell	356.7
2021-06-09	Halsell	356.7
2021-09-11	Halsell	394.7
2021-09-11	Halsell	394.7
2021-09-15	Halsell	446
2021-09-15	Halsell	446
2021-09-22	Halsell	422.4
2021-09-22	Halsell	422.4
2021-09-29	Halsell	782.2
2021-09-29	Halsell	782.2
2021-10-02	Halsell	732.5
2021-10-02	Halsell	732.5
2021-10-06	Halsell	876.6
2021-10-06	Halsell	876.6
2021-10-09	Halsell	636.1
2021-10-09	Halsell	636.1
2021-10-13	Halsell	586.8
2021-10-13	Halsell	586.8
2021-10-16	Halsell	869.7
2021-10-16	Halsell	869.7
2021-10-20	Halsell	582.1
2021-10-20	Halsell	582.1
2021-10-23	Halsell	524.2
2021-10-23	Halsell	524.2
2021-10-27	Halsell	390.7
2021-10-27	Halsell	390.7
2021-10-30	Halsell	329.9
2021-10-30	Halsell	329.9
2021-11-03	Halsell	603.3
2021-11-03	Halsell	603.3
2021-11-06	Halsell	330.3
2021-11-06	Halsell	330.3
2021-11-13	Halsell	306.6
2021-11-13	Halsell	306.6
2021-11-17	Halsell	473.1
2021-11-17	Halsell	473.1
2021-11-20	Halsell	891.2
2021-11-20	Halsell	891.2
2021-12-01	Halsell	505.3
2021-12-01	Halsell	505.3
2021-12-04	Halsell	612.9
2021-12-04	Halsell	612.9
2021-12-08	Halsell	555.4
2021-12-08	Halsell	555.4
2022-01-05	Halsell	231.4
2022-01-05	Halsell	231.4
2022-01-08	Halsell	388.5
2022-01-08	Halsell	388.5
2022-01-12	Halsell	565
2022-01-12	Halsell	565
2022-01-15	Halsell	670.3
2022-01-15	Halsell	670.3
2022-01-22	Halsell	517.2
2022-01-22	Halsell	517.2
2022-01-26	Halsell	786.4
2022-01-26	Halsell	786.4
2022-01-29	Halsell	1174
2022-01-29	Halsell	1174
2022-02-02	Halsell	1057
2022-02-02	Halsell	1057
2022-02-05	Halsell	554.8
2022-02-05	Halsell	554.8
2022-02-09	Halsell	715.4
2022-02-09	Halsell	715.4
2022-02-12	Halsell	875.6
2022-02-12	Halsell	875.6
2022-02-16	Halsell	630.3
2022-02-16	Halsell	630.3
2022-02-19	Halsell	725
2022-02-19	Halsell	725
2022-02-23	Halsell	607.9
2022-02-23	Halsell	607.9
2022-03-02	Halsell	398.1
2022-03-02	Halsell	398.1
2022-03-05	Halsell	991.4
2022-03-05	Halsell	991.4
2022-03-09	Halsell	613.8
2022-03-09	Halsell	613.8
2022-03-12	Halsell	594.2
2022-03-12	Halsell	594.2
2022-03-16	Halsell	685.9
2022-03-16	Halsell	685.9
2022-03-19	Halsell	463
2022-03-19	Halsell	463
2022-03-30	Halsell	597
2022-03-30	Halsell	597
2022-04-06	Halsell	404
2022-04-06	Halsell	404
2022-04-13	Halsell	316
2022-04-13	Halsell	316
2022-04-16	Halsell	434
2022-04-16	Halsell	434
2022-04-23	Halsell	409
2022-04-23	Halsell	409
2022-04-27	Halsell	661
2022-04-27	Halsell	661
2022-04-30	Halsell	484
2022-04-30	Halsell	484
2022-05-04	Halsell	714
2022-05-04	Halsell	714
2022-05-07	Halsell	463
2022-05-07	Halsell	463
2022-05-11	Halsell	950
2022-05-11	Halsell	950
2022-05-14	Halsell	348
2022-05-14	Halsell	348
2022-05-18	Halsell	447
2022-05-18	Halsell	447
2022-05-25	Halsell	538
2022-05-25	Halsell	538
2022-05-28	Halsell	433
2022-05-28	Halsell	433
2022-04-02	Hawley/Buxton Hall	1128
2022-04-02	Hawley/Buxton Hall	1128
2022-04-06	Hawley/Buxton Hall	847
2022-04-06	Hawley/Buxton Hall	847
2022-04-09	Hawley/Buxton Hall	1106
2022-04-09	Hawley/Buxton Hall	1106
2022-04-13	Hawley/Buxton Hall	985
2022-04-13	Hawley/Buxton Hall	985
2022-04-16	Hawley/Buxton Hall	888
2022-04-16	Hawley/Buxton Hall	888
2022-04-20	Hawley/Buxton Hall	891
2022-04-20	Hawley/Buxton Hall	891
2022-04-23	Hawley/Buxton Hall	913
2022-04-23	Hawley/Buxton Hall	913
2022-04-27	Hawley/Buxton Hall	1077
2022-04-27	Hawley/Buxton Hall	1077
2022-05-04	Hawley/Buxton Hall	1082
2022-05-04	Hawley/Buxton Hall	1082
2022-05-07	Hawley/Buxton Hall	916
2022-05-07	Hawley/Buxton Hall	916
2022-05-11	Hawley/Buxton Hall	1486
2022-05-11	Hawley/Buxton Hall	1486
2022-05-18	Hawley/Buxton Hall	730
2022-05-18	Hawley/Buxton Hall	730
2022-05-25	Hawley/Buxton Hall	841
2022-05-25	Hawley/Buxton Hall	841
2022-05-28	Hawley/Buxton Hall	859
2022-05-28	Hawley/Buxton Hall	859
2021-04-11	ILLC	491
2021-04-11	ILLC	491
2021-05-12	ILLC	481.4
2021-05-12	ILLC	481.4
2021-05-19	ILLC	456.6
2021-05-19	ILLC	456.6
2021-05-23	ILLC	410.4
2021-05-23	ILLC	410.4
2021-05-26	ILLC	421.5
2021-05-26	ILLC	421.5
2021-05-30	ILLC	283.9
2021-05-30	ILLC	283.9
2021-06-06	ILLC	382.2
2021-06-06	ILLC	382.2
2021-06-09	ILLC	386.6
2021-06-09	ILLC	386.6
2021-06-12	ILLC	326.8
2021-06-12	ILLC	326.8
2021-06-19	ILLC	302.1
2021-06-19	ILLC	302.1
2021-06-23	ILLC	346.7
2021-06-23	ILLC	346.7
2021-07-10	ILLC	342
2021-07-10	ILLC	342
2021-07-21	ILLC	330.5
2021-07-21	ILLC	330.5
2021-07-28	ILLC	429.5
2021-07-28	ILLC	429.5
2021-07-31	ILLC	299.5
2021-07-31	ILLC	299.5
2021-08-08	ILLC	294.6
2021-08-08	ILLC	294.6
2021-08-11	ILLC	356.7
2021-08-11	ILLC	356.7
2021-08-18	ILLC	348.1
2021-08-18	ILLC	348.1
2021-08-21	ILLC	383.1
2021-08-21	ILLC	383.1
2021-08-25	ILLC	330.2
2021-08-25	ILLC	330.2
2021-08-28	ILLC	345.1
2021-08-28	ILLC	345.1
2021-09-01	ILLC	325.9
2021-09-01	ILLC	325.9
2021-09-08	ILLC	426.5
2021-09-08	ILLC	426.5
2021-09-15	ILLC	390.9
2021-09-15	ILLC	390.9
2021-09-18	ILLC	317
2021-09-18	ILLC	317
2021-09-22	ILLC	591.9
2021-09-22	ILLC	591.9
2021-09-29	ILLC	592.4
2021-09-29	ILLC	592.4
2021-10-02	ILLC	658.8
2021-10-02	ILLC	658.8
2021-10-06	ILLC	717.1
2021-10-06	ILLC	717.1
2021-10-09	ILLC	23.96
2021-10-09	ILLC	23.96
2021-10-13	ILLC	620.2
2021-10-13	ILLC	620.2
2021-10-16	ILLC	673.7
2021-10-16	ILLC	673.7
2021-10-20	ILLC	749.9
2021-10-20	ILLC	749.9
2021-10-23	ILLC	538.7
2021-10-23	ILLC	538.7
2021-10-27	ILLC	218.8
2021-10-27	ILLC	218.8
2021-11-03	ILLC	568.7
2021-11-03	ILLC	568.7
2021-11-06	ILLC	376.5
2021-11-06	ILLC	376.5
2021-11-13	ILLC	363.4
2021-11-13	ILLC	363.4
2021-11-17	ILLC	557.4
2021-11-17	ILLC	557.4
2021-11-20	ILLC	682
2021-11-20	ILLC	682
2021-12-01	ILLC	736.1
2021-12-01	ILLC	736.1
2021-12-04	ILLC	731
2021-12-04	ILLC	731
2021-12-08	ILLC	622.1
2021-12-08	ILLC	622.1
2022-01-05	ILLC	271.3
2022-01-05	ILLC	271.3
2022-01-08	ILLC	433.6
2022-01-08	ILLC	433.6
2022-01-15	ILLC	653.9
2022-01-15	ILLC	653.9
2022-01-22	ILLC	918.9
2022-01-22	ILLC	918.9
2022-01-26	ILLC	1157
2022-01-26	ILLC	1157
2022-01-29	ILLC	1079
2022-01-29	ILLC	1079
2022-02-05	ILLC	666.8
2022-02-05	ILLC	666.8
2022-02-09	ILLC	716
2022-02-09	ILLC	716
2022-02-12	ILLC	659.1
2022-02-12	ILLC	659.1
2022-02-16	ILLC	710.6
2022-02-16	ILLC	710.6
2022-02-23	ILLC	756
2022-02-23	ILLC	756
2022-02-26	ILLC	723
2022-02-26	ILLC	723
2022-03-02	ILLC	548.5
2022-03-02	ILLC	548.5
2022-03-05	ILLC	679.6
2022-03-05	ILLC	679.6
2022-03-09	ILLC	980
2022-03-09	ILLC	980
2022-03-12	ILLC	794.4
2022-03-12	ILLC	794.4
2022-03-16	ILLC	464
2022-03-16	ILLC	464
2022-03-19	ILLC	387
2022-03-19	ILLC	387
2022-03-22	ILLC	300
2022-03-22	ILLC	300
2022-03-25	ILLC	591.7
2022-03-25	ILLC	591.7
2022-04-02	ILLC	736
2022-04-02	ILLC	736
2022-04-06	ILLC	482
2022-04-06	ILLC	482
2022-04-09	ILLC	556
2022-04-09	ILLC	556
2022-04-13	ILLC	364
2022-04-13	ILLC	364
2022-04-16	ILLC	488
2022-04-16	ILLC	488
2022-04-20	ILLC	422
2022-04-20	ILLC	422
2022-04-23	ILLC	534
2022-04-23	ILLC	534
2022-04-27	ILLC	807
2022-04-27	ILLC	807
2022-04-30	ILLC	492
2022-04-30	ILLC	492
2022-05-04	ILLC	932
2022-05-04	ILLC	932
2022-05-07	ILLC	459
2022-05-07	ILLC	459
2022-05-11	ILLC	945
2022-05-11	ILLC	945
2022-05-18	ILLC	559
2022-05-18	ILLC	559
2022-05-25	ILLC	632
2022-05-25	ILLC	632
2022-05-28	ILLC	546
2022-05-28	ILLC	546
2021-04-11	Poling/NW Weatherford	371
2021-04-11	Poling/NW Weatherford	371
2021-04-14	Poling/NW Weatherford	418
2021-04-14	Poling/NW Weatherford	418
2021-04-18	Poling/NW Weatherford	607
2021-04-18	Poling/NW Weatherford	607
2021-04-21	Poling/NW Weatherford	480
2021-04-21	Poling/NW Weatherford	480
2021-04-25	Poling/NW Weatherford	592
2021-04-25	Poling/NW Weatherford	592
2021-04-28	Poling/NW Weatherford	648
2021-04-28	Poling/NW Weatherford	648
2021-05-02	Poling/NW Weatherford	327
2021-05-02	Poling/NW Weatherford	327
2021-05-05	Poling/NW Weatherford	475
2021-05-05	Poling/NW Weatherford	475
2021-05-12	Poling/NW Weatherford	302.7
2021-05-12	Poling/NW Weatherford	302.7
2021-05-16	Poling/NW Weatherford	278
2021-05-16	Poling/NW Weatherford	278
2021-05-19	Poling/NW Weatherford	344.3
2021-05-19	Poling/NW Weatherford	344.3
2021-05-23	Poling/NW Weatherford	387.7
2021-05-23	Poling/NW Weatherford	387.7
2021-05-26	Poling/NW Weatherford	273.4
2021-05-26	Poling/NW Weatherford	273.4
2021-05-30	Poling/NW Weatherford	205
2021-05-30	Poling/NW Weatherford	205
2021-06-06	Poling/NW Weatherford	435.5
2021-06-06	Poling/NW Weatherford	435.5
2021-06-09	Poling/NW Weatherford	497.1
2021-06-09	Poling/NW Weatherford	497.1
2021-09-18	Poling/NW Weatherford	459
2021-09-18	Poling/NW Weatherford	459
2021-09-22	Poling/NW Weatherford	667.6
2021-09-22	Poling/NW Weatherford	667.6
2021-09-25	Poling/NW Weatherford	716.4
2021-09-25	Poling/NW Weatherford	716.4
2021-09-29	Poling/NW Weatherford	131.1
2021-09-29	Poling/NW Weatherford	131.1
2021-10-02	Poling/NW Weatherford	738.8
2021-10-02	Poling/NW Weatherford	738.8
2021-10-06	Poling/NW Weatherford	475.5
2021-10-06	Poling/NW Weatherford	475.5
2021-10-09	Poling/NW Weatherford	546
2021-10-09	Poling/NW Weatherford	546
2021-10-13	Poling/NW Weatherford	916.7
2021-10-13	Poling/NW Weatherford	916.7
2021-10-16	Poling/NW Weatherford	733.5
2021-10-16	Poling/NW Weatherford	733.5
2021-10-20	Poling/NW Weatherford	824.9
2021-10-20	Poling/NW Weatherford	824.9
2021-10-23	Poling/NW Weatherford	523.6
2021-10-23	Poling/NW Weatherford	523.6
2021-10-27	Poling/NW Weatherford	466.6
2021-10-27	Poling/NW Weatherford	466.6
2021-10-30	Poling/NW Weatherford	398.1
2021-10-30	Poling/NW Weatherford	398.1
2021-11-03	Poling/NW Weatherford	583.2
2021-11-03	Poling/NW Weatherford	583.2
2021-11-06	Poling/NW Weatherford	423.1
2021-11-06	Poling/NW Weatherford	423.1
2021-11-13	Poling/NW Weatherford	475.7
2021-11-13	Poling/NW Weatherford	475.7
2021-11-17	Poling/NW Weatherford	572.7
2021-11-17	Poling/NW Weatherford	572.7
2021-11-20	Poling/NW Weatherford	843.5
2021-11-20	Poling/NW Weatherford	843.5
2021-12-01	Poling/NW Weatherford	872.2
2021-12-01	Poling/NW Weatherford	872.2
2021-12-04	Poling/NW Weatherford	978
2021-12-04	Poling/NW Weatherford	978
2021-12-08	Poling/NW Weatherford	797.6
2021-12-08	Poling/NW Weatherford	797.6
2022-01-05	Poling/NW Weatherford	632.8
2022-01-05	Poling/NW Weatherford	632.8
2022-01-08	Poling/NW Weatherford	606.4
2022-01-08	Poling/NW Weatherford	606.4
2022-01-22	Poling/NW Weatherford	758.3
2022-01-22	Poling/NW Weatherford	758.3
2022-01-26	Poling/NW Weatherford	994.4
2022-01-26	Poling/NW Weatherford	994.4
2022-01-29	Poling/NW Weatherford	1003
2022-01-29	Poling/NW Weatherford	1003
2022-02-02	Poling/NW Weatherford	1140
2022-02-02	Poling/NW Weatherford	1140
2022-02-05	Poling/NW Weatherford	660.6
2022-02-05	Poling/NW Weatherford	660.6
2022-02-09	Poling/NW Weatherford	805.3
2022-02-09	Poling/NW Weatherford	805.3
2022-02-16	Poling/NW Weatherford	872.4
2022-02-16	Poling/NW Weatherford	872.4
2022-02-19	Poling/NW Weatherford	867.7
2022-02-19	Poling/NW Weatherford	867.7
2022-02-23	Poling/NW Weatherford	747.6
2022-02-23	Poling/NW Weatherford	747.6
2022-03-02	Poling/NW Weatherford	759.3
2022-03-02	Poling/NW Weatherford	759.3
2022-03-05	Poling/NW Weatherford	969.3
2022-03-05	Poling/NW Weatherford	969.3
2022-03-09	Poling/NW Weatherford	1188
2022-03-09	Poling/NW Weatherford	1188
2022-03-12	Poling/NW Weatherford	1117
2022-03-12	Poling/NW Weatherford	1117
2022-03-16	Poling/NW Weatherford	1165
2022-03-16	Poling/NW Weatherford	1165
2022-03-19	Poling/NW Weatherford	403
2022-03-19	Poling/NW Weatherford	403
2022-04-02	Poling/NW Weatherford	744
2022-04-02	Poling/NW Weatherford	744
2022-04-06	Poling/NW Weatherford	717
2022-04-06	Poling/NW Weatherford	717
2022-04-09	Poling/NW Weatherford	788
2022-04-09	Poling/NW Weatherford	788
2022-04-20	Poling/NW Weatherford	306
2022-04-20	Poling/NW Weatherford	306
2022-04-23	Poling/NW Weatherford	578
2022-04-23	Poling/NW Weatherford	578
2022-04-27	Poling/NW Weatherford	855
2022-04-27	Poling/NW Weatherford	855
2022-04-30	Poling/NW Weatherford	1051
2022-04-30	Poling/NW Weatherford	1051
2022-05-11	Poling/NW Weatherford	1165
2022-05-11	Poling/NW Weatherford	1165
2022-05-14	Poling/NW Weatherford	505
2022-05-14	Poling/NW Weatherford	505
2022-05-18	Poling/NW Weatherford	698
2022-05-18	Poling/NW Weatherford	698
2022-05-25	Poling/NW Weatherford	782
2022-05-25	Poling/NW Weatherford	782
2021-04-11	Sackett Hall	1280
2021-04-11	Sackett Hall	1280
2021-04-14	Sackett Hall	1234
2021-04-14	Sackett Hall	1234
2021-04-18	Sackett Hall	1251
2021-04-18	Sackett Hall	1251
2021-04-21	Sackett Hall	1230
2021-04-21	Sackett Hall	1230
2021-04-25	Sackett Hall	1147
2021-04-25	Sackett Hall	1147
2021-04-28	Sackett Hall	43.7
2021-04-28	Sackett Hall	43.7
2021-05-02	Sackett Hall	1680
2021-05-02	Sackett Hall	1680
2021-05-05	Sackett Hall	1203
2021-05-05	Sackett Hall	1203
2021-05-09	Sackett Hall	1339
2021-05-09	Sackett Hall	1339
2021-05-12	Sackett Hall	1019
2021-05-12	Sackett Hall	1019
2021-05-16	Sackett Hall	564
2021-05-16	Sackett Hall	564
2021-05-19	Sackett Hall	1070
2021-05-19	Sackett Hall	1070
2021-05-26	Sackett Hall	1130
2021-05-26	Sackett Hall	1130
2021-06-06	Sackett Hall	1071
2021-06-06	Sackett Hall	1071
2021-06-09	Sackett Hall	1037
2021-06-09	Sackett Hall	1037
2021-09-15	Sackett Hall	916.9
2021-09-15	Sackett Hall	916.9
2021-09-18	Sackett Hall	710.6
2021-09-18	Sackett Hall	710.6
2021-09-22	Sackett Hall	963.5
2021-09-22	Sackett Hall	963.5
2021-09-25	Sackett Hall	1223
2021-09-25	Sackett Hall	1223
2021-09-29	Sackett Hall	985.3
2021-09-29	Sackett Hall	985.3
2021-10-02	Sackett Hall	1101
2021-10-02	Sackett Hall	1101
2021-10-06	Sackett Hall	1020
2021-10-06	Sackett Hall	1020
2021-10-09	Sackett Hall	1148
2021-10-09	Sackett Hall	1148
2021-10-13	Sackett Hall	1023
2021-10-13	Sackett Hall	1023
2021-10-16	Sackett Hall	1112
2021-10-16	Sackett Hall	1112
2021-10-20	Sackett Hall	878.6
2021-10-20	Sackett Hall	878.6
2021-10-23	Sackett Hall	833
2021-10-23	Sackett Hall	833
2021-10-27	Sackett Hall	782.8
2021-10-27	Sackett Hall	782.8
2021-10-30	Sackett Hall	949.1
2021-10-30	Sackett Hall	949.1
2021-11-03	Sackett Hall	772
2021-11-03	Sackett Hall	772
2021-11-06	Sackett Hall	722.4
2021-11-06	Sackett Hall	722.4
2021-11-13	Sackett Hall	805
2021-11-13	Sackett Hall	805
2021-11-17	Sackett Hall	736.6
2021-11-17	Sackett Hall	736.6
2021-11-20	Sackett Hall	1494
2021-11-20	Sackett Hall	1494
2021-12-01	Sackett Hall	1047
2021-12-01	Sackett Hall	1047
2021-12-08	Sackett Hall	1144
2021-12-08	Sackett Hall	1144
2022-01-05	Sackett Hall	489.2
2022-01-05	Sackett Hall	489.2
2022-01-19	Sackett Hall	1172
2022-01-19	Sackett Hall	1172
2022-01-22	Sackett Hall	1433
2022-01-22	Sackett Hall	1433
2022-01-26	Sackett Hall	1558
2022-01-26	Sackett Hall	1558
2022-02-02	Sackett Hall	1746
2022-02-02	Sackett Hall	1746
2022-02-05	Sackett Hall	1098
2022-02-05	Sackett Hall	1098
2022-02-09	Sackett Hall	977.4
2022-02-09	Sackett Hall	977.4
2022-02-12	Sackett Hall	858.2
2022-02-12	Sackett Hall	858.2
2022-02-19	Sackett Hall	1034
2022-02-19	Sackett Hall	1034
2022-02-23	Sackett Hall	936.3
2022-02-23	Sackett Hall	936.3
2022-02-26	Sackett Hall	1089
2022-02-26	Sackett Hall	1089
2022-03-02	Sackett Hall	890
2022-03-02	Sackett Hall	890
2022-03-09	Sackett Hall	1375
2022-03-09	Sackett Hall	1375
2022-03-12	Sackett Hall	1402
2022-03-12	Sackett Hall	1402
2022-03-16	Sackett Hall	756
2022-03-16	Sackett Hall	756
2022-03-19	Sackett Hall	491
2022-03-19	Sackett Hall	491
2022-03-30	Sackett Hall	1013
2022-03-30	Sackett Hall	1013
2022-04-02	Sackett Hall	1016
2022-04-02	Sackett Hall	1016
2022-04-06	Sackett Hall	840
2022-04-06	Sackett Hall	840
2022-04-09	Sackett Hall	985
2022-04-09	Sackett Hall	985
2022-04-13	Sackett Hall	572
2022-04-13	Sackett Hall	572
2022-04-20	Sackett Hall	714
2022-04-20	Sackett Hall	714
2022-04-23	Sackett Hall	891
2022-04-23	Sackett Hall	891
2022-04-27	Sackett Hall	1093
2022-04-27	Sackett Hall	1093
2022-04-30	Sackett Hall	789
2022-04-30	Sackett Hall	789
2022-05-04	Sackett Hall	1185
2022-05-04	Sackett Hall	1185
2022-05-07	Sackett Hall	409
2022-05-07	Sackett Hall	409
2022-05-11	Sackett Hall	1247
2022-05-11	Sackett Hall	1247
2022-05-14	Sackett Hall	637
2022-05-14	Sackett Hall	637
2022-05-18	Sackett Hall	810
2022-05-18	Sackett Hall	810
2022-05-25	Sackett Hall	886
2022-05-25	Sackett Hall	886
2021-04-11	Weatherford Hall	1023
2021-04-11	Weatherford Hall	1023
2021-04-14	Weatherford Hall	1088
2021-04-14	Weatherford Hall	1088
2021-04-18	Weatherford Hall	1214
2021-04-18	Weatherford Hall	1214
2021-04-21	Weatherford Hall	1298
2021-04-21	Weatherford Hall	1298
2021-04-25	Weatherford Hall	1019
2021-04-25	Weatherford Hall	1019
2021-04-28	Weatherford Hall	1423
2021-04-28	Weatherford Hall	1423
2021-05-02	Weatherford Hall	1025
2021-05-02	Weatherford Hall	1025
2021-05-05	Weatherford Hall	1066
2021-05-05	Weatherford Hall	1066
2021-05-09	Weatherford Hall	1429
2021-05-09	Weatherford Hall	1429
2021-05-12	Weatherford Hall	613.7
2021-05-12	Weatherford Hall	613.7
2021-05-19	Weatherford Hall	516.9
2021-05-19	Weatherford Hall	516.9
2021-05-23	Weatherford Hall	697.1
2021-05-23	Weatherford Hall	697.1
2021-05-26	Weatherford Hall	503.2
2021-05-26	Weatherford Hall	503.2
2021-06-09	Weatherford Hall	463.3
2021-06-09	Weatherford Hall	463.3
2021-09-18	Weatherford Hall	544.6
2021-09-18	Weatherford Hall	544.6
2021-09-22	Weatherford Hall	614.7
2021-09-22	Weatherford Hall	614.7
2021-09-29	Weatherford Hall	385
2021-09-29	Weatherford Hall	385
2021-10-02	Weatherford Hall	768.5
2021-10-02	Weatherford Hall	768.5
2021-10-06	Weatherford Hall	813.7
2021-10-06	Weatherford Hall	813.7
2021-10-09	Weatherford Hall	829
2021-10-09	Weatherford Hall	829
2021-10-13	Weatherford Hall	785.7
2021-10-13	Weatherford Hall	785.7
2021-10-16	Weatherford Hall	842.5
2021-10-16	Weatherford Hall	842.5
2021-10-20	Weatherford Hall	1094
2021-10-20	Weatherford Hall	1094
2021-10-27	Weatherford Hall	629.9
2021-10-27	Weatherford Hall	629.9
2021-11-03	Weatherford Hall	655
2021-11-03	Weatherford Hall	655
2021-11-06	Weatherford Hall	630.4
2021-11-06	Weatherford Hall	630.4
2021-11-13	Weatherford Hall	556.2
2021-11-13	Weatherford Hall	556.2
2021-11-17	Weatherford Hall	666.6
2021-11-17	Weatherford Hall	666.6
2021-11-20	Weatherford Hall	835.5
2021-11-20	Weatherford Hall	835.5
2021-12-01	Weatherford Hall	983.5
2021-12-01	Weatherford Hall	983.5
2021-12-08	Weatherford Hall	559.8
2021-12-08	Weatherford Hall	559.8
2022-01-05	Weatherford Hall	522.7
2022-01-05	Weatherford Hall	522.7
2022-01-08	Weatherford Hall	620.7
2022-01-08	Weatherford Hall	620.7
2022-01-19	Weatherford Hall	1098
2022-01-19	Weatherford Hall	1098
2022-01-22	Weatherford Hall	1296
2022-01-22	Weatherford Hall	1296
2022-01-26	Weatherford Hall	1385
2022-01-26	Weatherford Hall	1385
2022-01-29	Weatherford Hall	1102
2022-01-29	Weatherford Hall	1102
2022-02-02	Weatherford Hall	1333
2022-02-02	Weatherford Hall	1333
2022-02-05	Weatherford Hall	881.6
2022-02-05	Weatherford Hall	881.6
2022-02-12	Weatherford Hall	959.4
2022-02-12	Weatherford Hall	959.4
2022-02-16	Weatherford Hall	958.3
2022-02-16	Weatherford Hall	958.3
2022-02-19	Weatherford Hall	1323
2022-02-19	Weatherford Hall	1323
2022-02-23	Weatherford Hall	933
2022-02-23	Weatherford Hall	933
2022-02-26	Weatherford Hall	1126
2022-02-26	Weatherford Hall	1126
2022-03-02	Weatherford Hall	894.2
2022-03-02	Weatherford Hall	894.2
2022-03-05	Weatherford Hall	887.6
2022-03-05	Weatherford Hall	887.6
2022-03-09	Weatherford Hall	1305
2022-03-09	Weatherford Hall	1305
2022-03-12	Weatherford Hall	860.9
2022-03-12	Weatherford Hall	860.9
2022-03-16	Weatherford Hall	1015
2022-03-16	Weatherford Hall	1015
2022-03-19	Weatherford Hall	397
2022-03-19	Weatherford Hall	397
2022-03-30	Weatherford Hall	1046
2022-03-30	Weatherford Hall	1046
2022-04-02	Weatherford Hall	660
2022-04-02	Weatherford Hall	660
2022-04-06	Weatherford Hall	784
2022-04-06	Weatherford Hall	784
2022-04-09	Weatherford Hall	880
2022-04-09	Weatherford Hall	880
2022-04-13	Weatherford Hall	628
2022-04-13	Weatherford Hall	628
2022-04-16	Weatherford Hall	570
2022-04-16	Weatherford Hall	570
2022-04-20	Weatherford Hall	712
2022-04-20	Weatherford Hall	712
2022-04-23	Weatherford Hall	711
2022-04-23	Weatherford Hall	711
2022-04-27	Weatherford Hall	917
2022-04-27	Weatherford Hall	917
2022-04-30	Weatherford Hall	667
2022-04-30	Weatherford Hall	667
2022-05-04	Weatherford Hall	931
2022-05-04	Weatherford Hall	931
2022-05-07	Weatherford Hall	994
2022-05-07	Weatherford Hall	994
2022-05-11	Weatherford Hall	1131
2022-05-11	Weatherford Hall	1131
2022-05-14	Weatherford Hall	843
2022-05-14	Weatherford Hall	843
2022-05-28	Weatherford Hall	790
2022-05-28	Weatherford Hall	790
2021-04-14	West Hall	990
2021-04-14	West Hall	990
2021-04-18	West Hall	944
2021-04-18	West Hall	944
2021-04-21	West Hall	1009
2021-04-21	West Hall	1009
2021-04-28	West Hall	1416
2021-04-28	West Hall	1416
2021-05-02	West Hall	1009
2021-05-02	West Hall	1009
2021-05-05	West Hall	1118
2021-05-05	West Hall	1118
2021-05-09	West Hall	1062
2021-05-09	West Hall	1062
2021-05-12	West Hall	718.1
2021-05-12	West Hall	718.1
2021-05-16	West Hall	686.1
2021-05-16	West Hall	686.1
2021-05-19	West Hall	716.2
2021-05-19	West Hall	716.2
2021-05-23	West Hall	728.6
2021-05-23	West Hall	728.6
2021-05-26	West Hall	721.3
2021-05-26	West Hall	721.3
2021-06-06	West Hall	832.9
2021-06-06	West Hall	832.9
2021-06-09	West Hall	534.8
2021-06-09	West Hall	534.8
2021-09-15	West Hall	290
2021-09-15	West Hall	290
2021-09-18	West Hall	522.8
2021-09-18	West Hall	522.8
2021-09-22	West Hall	724.7
2021-09-22	West Hall	724.7
2021-09-25	West Hall	839.9
2021-09-25	West Hall	839.9
2021-09-29	West Hall	677.5
2021-09-29	West Hall	677.5
2021-10-02	West Hall	642.7
2021-10-02	West Hall	642.7
2021-10-06	West Hall	767.4
2021-10-06	West Hall	767.4
2021-10-09	West Hall	918.7
2021-10-09	West Hall	918.7
2021-10-13	West Hall	585.4
2021-10-13	West Hall	585.4
2021-10-16	West Hall	796.1
2021-10-16	West Hall	796.1
2021-10-20	West Hall	496.1
2021-10-20	West Hall	496.1
2021-10-27	West Hall	545.3
2021-10-27	West Hall	545.3
2021-11-06	West Hall	633
2021-11-06	West Hall	633
2021-11-13	West Hall	231
2021-11-13	West Hall	231
2021-11-17	West Hall	533.6
2021-11-17	West Hall	533.6
2021-11-20	West Hall	1101
2021-11-20	West Hall	1101
2021-12-01	West Hall	972.6
2021-12-01	West Hall	972.6
2021-12-04	West Hall	1050
2021-12-04	West Hall	1050
2021-12-08	West Hall	465.9
2021-12-08	West Hall	465.9
2022-01-05	West Hall	720.8
2022-01-05	West Hall	720.8
2022-01-08	West Hall	969.6
2022-01-08	West Hall	969.6
2022-01-15	West Hall	971.9
2022-01-15	West Hall	971.9
2022-01-19	West Hall	640.3
2022-01-19	West Hall	640.3
2022-01-26	West Hall	974.8
2022-01-26	West Hall	974.8
2022-01-29	West Hall	1223
2022-01-29	West Hall	1223
2022-02-02	West Hall	1297
2022-02-02	West Hall	1297
2022-02-05	West Hall	1061
2022-02-05	West Hall	1061
2022-02-09	West Hall	896.9
2022-02-09	West Hall	896.9
2022-02-12	West Hall	936.6
2022-02-12	West Hall	936.6
2022-02-16	West Hall	717.1
2022-02-16	West Hall	717.1
2022-02-19	West Hall	1070
2022-02-19	West Hall	1070
2022-02-23	West Hall	900.2
2022-02-23	West Hall	900.2
2022-02-26	West Hall	825.9
2022-02-26	West Hall	825.9
2022-03-02	West Hall	1195
2022-03-02	West Hall	1195
2022-03-05	West Hall	1466
2022-03-05	West Hall	1466
2022-03-09	West Hall	1697
2022-03-09	West Hall	1697
2022-03-12	West Hall	982.5
2022-03-12	West Hall	982.5
2022-03-16	West Hall	651
2022-03-16	West Hall	651
2022-03-19	West Hall	554
2022-03-19	West Hall	554
2022-03-30	West Hall	639
2022-03-30	West Hall	639
2022-04-02	West Hall	881
2022-04-02	West Hall	881
2022-04-06	West Hall	780
2022-04-06	West Hall	780
2022-04-09	West Hall	831
2022-04-09	West Hall	831
2022-04-13	West Hall	812
2022-04-13	West Hall	812
2022-04-16	West Hall	935
2022-04-16	West Hall	935
2022-04-20	West Hall	856
2022-04-20	West Hall	856
2022-04-23	West Hall	852
2022-04-23	West Hall	852
[truncated: 156 more rows]

## Sheet: East Campus LogCopiesPerL
East Campus Wastewater Sampling Location
Date	Log10 gc/L
2020-09-21	3.176
2020-09-27	3.198
2020-09-30	4.919
2020-10-04	2.5
2020-10-07	3.461
2020-10-11	3.176
2020-10-14	3.198
2020-10-18	3.53
2020-10-21	3.051
2020-10-25	3.449
2020-10-28	3.051
2020-11-01	3.176
2020-11-04	3.352
2020-11-08	4.118
2020-11-11	3.176
2020-11-15	3.4
2020-11-18	2.5
2020-12-02	2.5
2021-01-13	3.987
2021-01-17	4.583
2021-01-20	5.47
2021-01-24	5.444
2021-01-27	4.855
2021-02-03	4.616
2021-02-07	5.823
2021-02-14	4.274
2021-02-17	4.858
2021-02-24	5.094
2021-02-28	5.728
2021-03-03	5.339
2021-03-07	5.25
2021-03-10	5.012
2021-03-14	4.847
2021-03-17	4.301
2021-03-28	3.574
2021-03-31	3.615
2021-04-04	4.377
2021-04-07	4.158
2021-04-11	3.737
2021-04-14	3.109
2021-04-18	#N/A
2021-04-21	4.589
2021-04-25	3.643
2021-04-28	4.052
2021-05-02	4.36
2021-05-05	4.587
2021-05-09	4.155
2021-05-12	3.975
2021-05-16	3.939
2021-05-19	3.945
2021-05-23	3.176
2021-05-26	3.598
2021-05-30	3.176
2021-06-02	3.176
2021-06-06	3.376
2021-06-09	3.644
2021-06-12	3.176
2021-06-16	3
2021-06-19	3.109
2021-06-23	3.109
2021-06-26	3.051
2021-06-30	3
2021-07-03	3
2021-07-07	3.239
2021-07-10	2.5
2021-07-14	3.04
2021-07-18	3.109
2021-07-21	3.051
2021-07-24	3
2021-07-28	3.176
2021-07-30	3.168
2021-08-04	3.536
2021-08-08	3.255
2021-08-11	2.5
2021-08-14	3.109
2021-08-18	3.255
2021-08-21	4.379
2021-08-25	3.255
2021-08-28	3.255
2021-09-03	3.176
2021-09-08	4.48
2021-09-11	3.255
2021-09-15	3.255
2021-09-18	4.059
2021-09-22	4.172
2021-09-25	3.564
2021-09-29	3.255
2021-10-02	3.921
2021-10-06	3.646
2021-10-09	2.5
2021-10-13	3.518
2021-10-16	4.183
2021-10-20	4.434
2021-10-23	5.271
2021-10-27	3.255
2021-10-30	4.404
2021-11-03	4.496
2021-11-06	3.255
2021-11-13	5.062
2021-11-17	4.897
2021-11-20	4.245
2021-12-01	4.171
2021-12-04	4.079
2021-12-08	3.695
2021-12-15	3.255
2021-12-22	3.255
2021-12-29	3.589
2022-01-01	3.255
2022-01-05	5.613
2022-01-08	5.152
2022-01-12	5.028
2022-01-15	5.646
2022-01-19	5.463
2022-01-22	5.844
2022-01-26	4.683
2022-01-29	4.896
2022-02-02	5.266
2022-02-05	4.389
2022-02-09	4.205
2022-02-12	4.619
2022-02-16	5.078
2022-02-19	4.205
2022-02-23	3.352
2022-02-26	5.604
2022-03-02	2.5
2022-03-05	3.477
2022-03-09	3.176
2022-03-12	3.981
2022-03-16	3.255
2022-03-19	3.922
2022-03-22	4.273
2022-03-25	3.255
2022-04-02	4.261
2022-04-09	3.352
2022-04-13	4.242
2022-04-16	4.62
2022-04-20	4.917
2022-04-23	4.441
2022-04-27	4.089
2022-04-30	4.09
2022-05-04	5.137
2022-05-07	4.427
2022-05-11	5.045
2022-05-14	4.465
2022-05-18	4.699
2022-05-21	4.885
2022-05-25	5.463
2022-05-28	5.044
2022-06-01	4.897
2022-06-04	4.62
2022-06-08	4.828
2022-06-10	4.79
2022-06-11	3.862
2022-06-12	4.002
2022-06-15	4.267
2022-06-18	4.274

## Sheet: Corvallis WWTP LogCopiesPerL
Corvallis, Oregon Wastewater Treatment Plant
Date	Log10 gc/L
2020-09-21	3.45642
2020-09-22	4.18835
2020-09-24	3.80474
2020-09-28	4.05216
2020-09-29	3.925
2020-10-01	3.78827
2020-10-04	3.32293
2020-10-05	3.34938
2020-10-06	3.90426
2020-10-08	3.31517
2020-10-11	3.75901
2020-10-12	4.09639
2020-10-13	3.81556
2020-10-15	3.364
2020-10-18	3.449
2020-10-19	3.335
2020-10-20	3.176
2020-10-22	3.176
2020-10-25	3.176
2020-10-26	4.38
2020-10-27	4.795
2020-10-28	3.834
2020-10-29	4.132
2020-11-01	4.019
2020-11-02	3.385
2020-11-03	4.484
2020-11-04	3.979
2020-11-09	4.242
2020-11-10	4.529
2020-11-11	4.896
2020-11-12	4.667
2020-11-15	4.379
2020-11-16	4.272
2020-11-17	4.186
2020-11-19	4.41
2020-11-22	4.539
2020-11-23	4.58
2020-11-24	4.454
2020-11-29	4.393
2020-11-30	4.531
2020-12-01	4.675
2020-12-03	4.447
2020-12-06	4.498
2020-12-07	4.638
2020-12-08	4.853
2020-12-10	4.681
2020-12-14	4.46
2020-12-15	4.604
2020-12-16	4.422
2020-12-17	4.433
2020-12-20	3.972
2020-12-21	4.391
2020-12-22	4.279
2020-12-23	4.183
2020-12-27	4.339
2020-12-28	4.998
2020-12-29	5.319
2020-12-30	4.248
2021-01-03	3.752
2021-01-04	3.877
2021-01-06	4.265
2021-01-07	4.05
2021-01-10	4.491
2021-01-12	3.534
2021-01-13	4.106
2021-01-14	3.918
2021-01-17	4.194
2021-01-18	4.223
2021-01-19	4.61
2021-01-21	4.611
2021-01-24	4.153
2021-01-25	4.198
2021-01-26	3.777
2021-01-28	4.081
2021-01-31	3.995
2021-02-01	3.769
2021-02-02	4.073
2021-02-04	4.263
2021-02-07	3.914
2021-02-08	4.381
2021-02-09	4.56
2021-02-10	4.009
2021-02-14	4.109
2021-02-15	3.7
2021-02-16	4.095
2021-02-18	4.027
2021-02-21	4.235
2021-02-22	4.262
2021-02-23	3.988
2021-02-24	3.987
2021-02-28	4.019
2021-03-01	4.082
2021-03-02	4.072
2021-03-03	3.827
2021-03-04	4.405
2021-03-07	4.098
2021-03-08	3.37
2021-03-09	3.816
2021-03-11	4.237
2021-03-14	4.23
2021-03-15	4.052
2021-03-17	4.06
2021-03-18	3.308
2021-03-21	5.21
2021-03-22	3.744
2021-03-23	4.108
2021-03-25	4.28
2021-03-28	3.831
2021-03-29	3.94
2021-03-30	3.976
2021-03-31	4.141
2021-04-04	4.226
2021-04-05	4.274
2021-04-06	4.375
2021-04-08	4.287
2021-04-11	4.176
2021-04-12	4.139
2021-04-13	4.143
2021-04-18	4.357
2021-04-19	4.536
2021-04-20	4.167
2021-04-22	4.646
2021-04-25	4.545
2021-04-27	4.481
2021-04-28	4.157
2021-04-29	4.704
2021-05-02	5.142
2021-05-03	4.463
2021-05-04	4.712
2021-05-06	4.336
2021-05-09	4.193
2021-05-10	4.191
2021-05-13	4.023
2021-05-16	3.954
2021-05-17	4.28
2021-05-18	3.94
2021-05-20	4.705
2021-05-25	3.739
2021-05-26	3.176
2021-05-27	4.356
2021-05-30	3.589
2021-05-31	3.979
2021-06-01	4.035
2021-06-03	3.912
2021-06-06	4.434
2021-06-07	3.994
2021-06-08	4.034
2021-06-10	3.837
2021-06-13	3.224
2021-06-14	3.679
2021-06-15	3.8
2021-06-17	3.491
2021-06-20	3.607
2021-06-21	3.612
2021-06-22	3.365
2021-06-28	3.396
2021-06-29	4.062
2021-06-30	3.176
2021-07-01	3.109
2021-07-04	3.109
2021-07-05	3.419
2021-07-06	3.556
2021-07-08	3.606
2021-07-11	3.796
2021-07-12	3.984
2021-07-13	3.335
2021-07-15	3.255
2021-07-18	3.738
2021-07-19	3.882
2021-07-20	3.497
2021-07-25	4.153
2021-07-26	4.293
2021-07-27	4.629
2021-07-29	4.911
2021-08-01	4.317
2021-08-02	4.519
2021-08-03	4.542
2021-08-05	4.413
2021-08-08	4.73
2021-08-09	4.821
2021-08-10	4.94
2021-08-12	4.268
2021-08-15	4.803
2021-08-16	4.652
2021-08-17	4.513
2021-08-19	4.57
2021-08-22	4.301
2021-08-23	4.273
2021-08-24	4.65
2021-08-26	4.773
2021-08-30	4.371
2021-08-31	4.559
2021-09-01	4.643
2021-09-02	4.829
2021-09-05	4.367
2021-09-06	4.584
2021-09-07	4.691
2021-09-09	4.923
2021-09-12	4.538
2021-09-13	4.823
2021-09-14	4.635
2021-09-16	4.853
2021-09-19	4.56
2021-09-20	4.503
2021-09-21	4.754
2021-09-23	3.549
2021-09-26	4.672
2021-09-27	4.703
2021-09-28	4.619
2021-09-30	4.849
2021-10-03	4.553
2021-10-04	4.924
2021-10-05	4.548
2021-10-07	4.852
2021-10-10	4.708
2021-10-11	4.42
2021-10-12	4.675
2021-10-14	4.562
2021-10-17	4.409
2021-10-18	4.644
2021-10-19	4.545
2021-10-21	4.231
2021-10-24	4.328
2021-10-25	4.358
2021-10-26	5.023
2021-10-28	3.999
2021-10-31	4.24
2021-11-02	4.121
2021-11-03	4.026
2021-11-04	4.307
2021-11-07	4.126
2021-11-08	4.18
2021-11-09	3.959
2021-11-14	4.526
2021-11-15	4.099
2021-11-16	4.449
2021-11-21	4.19
2021-11-22	4.121
2021-11-23	4.085
2021-11-28	4.115
2021-11-29	4.28
2021-11-30	4.162
2021-12-02	4.539
2021-12-05	3.983
2021-12-06	3.828
2021-12-07	4.442
2021-12-09	4.036
2021-12-12	3.4
2021-12-13	3.54
2021-12-14	3.89
2021-12-16	3.406
2021-12-17	4.395
2021-12-19	3.398
2021-12-20	3.255
2021-12-21	4.144
2021-12-22	3.483
2021-12-26	4.043
2021-12-27	4.248
2021-12-28	4.374
2021-12-29	4.795
2022-01-02	4.334
2022-01-03	4.132
2022-01-04	4.559
2022-01-06	4.449
2022-01-10	4.629
2022-01-11	4.851
2022-01-12	5.011
2022-01-13	4.905
2022-01-16	4.832
2022-01-17	5.043
2022-01-20	5.305
2022-01-23	5.265
2022-01-24	5.067
2022-01-25	5.237
2022-01-27	4.866
2022-01-30	4.851
2022-01-31	5.069
2022-02-01	4.942
2022-02-02	4.746
2022-02-06	4.89
2022-02-07	4.91
2022-02-08	4.93
2022-02-10	4.862
2022-02-14	4.324
2022-02-15	4.497
2022-02-16	4.735
2022-02-17	4.735
2022-02-20	4.458
2022-02-21	4.265
2022-02-22	4.551
2022-02-24	4.241
2022-02-27	4.23
2022-02-28	3.502
2022-03-01	3.58
2022-03-02	3.637
2022-03-06	3.504
2022-03-07	3.551
2022-03-08	3.805
2022-03-10	3.5
2022-03-13	3.55
2022-03-14	3.207
2022-03-15	3.673
2022-03-17	3.176
2022-03-20	4.062
2022-03-21	3.617
2022-03-22	3.42
2022-03-25	4.083
2022-03-27	4.459
2022-03-28	4.673
2022-03-29	4.449
2022-03-31	4.409
2022-04-03	4.53
2022-04-04	3.994
2022-04-05	4.396
2022-04-07	4.301
2022-04-10	4.241
2022-04-11	4.219
2022-04-12	4.384
2022-04-14	4.214
2022-04-17	4.667
2022-04-18	4.718
2022-04-19	4.839
2022-04-21	4.88
2022-04-24	4.369
2022-04-25	4.574
2022-04-26	5.112
2022-04-28	4.818
2022-05-01	4.636
2022-05-02	4.943
2022-05-03	4.655
2022-05-05	4.495
2022-05-08	4.935
2022-05-09	4.844
2022-05-10	4.948
2022-05-12	4.831
2022-05-15	4.64
2022-05-16	5.202
2022-05-17	5.139
2022-05-19	5.458
2022-05-23	5.302
2022-05-24	5.421
2022-05-25	5.185
2022-05-29	4.952
2022-05-31	5.276
2022-06-02	5.184
2022-06-05	5.409

## Sheet: Albany WWTP LogCopiesPerL
Albany, Oregon Wastewater Treatment Plant
Date	Log10 gc/L
2020-09-23	4.347
2020-09-30	3.704
2020-10-07	4.063
2020-10-15	4.144
2020-10-21	3.627
2020-10-28	4.21
2020-11-04	4.265
2020-11-12	4.457
2020-11-19	4.307
2020-11-23	4.671
2020-12-02	4.876
2020-12-29	4.421
2021-01-06	4.738
2021-01-15	4.143
2021-01-20	4.389
2021-01-28	4.212
2021-02-04	3.809
2021-02-11	3.369
2021-02-18	3.787
2021-02-25	3.975
2021-03-04	4.396
2021-03-12	4.174
2021-03-18	4.708
2021-03-26	4.502
2021-03-31	4.541
2021-04-07	4.526
2021-04-14	4.765
2021-04-21	4.639
2021-04-28	4.982
2021-05-06	4.956
2021-05-12	4.842
2021-05-20	4.337
2021-05-26	4.354
2021-06-03	4.101
2021-06-10	4.111
2021-06-17	3.908
2021-06-23	4.486
2021-07-01	4.295
2021-07-08	3.936
2021-07-14	4.909
2021-07-23	5.018
2021-07-29	4.937
2021-08-05	4.714
2021-08-12	5.05
2021-08-13	5.101
2021-08-19	5.292
2021-08-20	5.128
2021-08-26	5.281
2021-08-27	5.123
2021-09-01	5.633
2021-09-02	5.502
2021-09-03	5.611
2021-09-09	5.399
2021-09-10	5.319
2021-09-15	5.605
2021-09-17	5.388
2021-09-22	5.015
2021-09-24	5.478
2021-09-29	5.054
2021-10-01	5.3
2021-10-06	5.254
2021-10-08	5.195
2021-10-12	4.718
2021-10-13	4.812
2021-10-15	5.147
2021-10-20	4.96
2021-10-21	5.218
2021-10-27	4.848
2021-10-29	4.989
2021-11-03	4.994
2021-11-04	4.877
2021-11-09	4.905
2021-11-10	4.677
2021-11-16	4.582
2021-11-17	4.738
2021-11-22	4.682
2021-11-23	5.832
2021-12-01	5.028
2021-12-02	4.753
2021-12-08	4.501
2021-12-09	4.742
2021-12-14	4.246
2021-12-15	4.742
2021-12-22	4.885
2021-12-23	4.935
2021-12-28	4.713
2021-12-29	4.821
2022-01-05	4.933
2022-01-06	4.755
2022-01-12	5.212
2022-01-13	5.622
2022-01-19	5.348
2022-01-20	5.133
2022-01-26	5.434
2022-01-27	5.407
2022-02-02	5.251
2022-02-04	5.402
2022-02-08	5.018
2022-02-09	5.092
2022-02-15	4.881
2022-02-16	5.001
2022-02-23	4.614
2022-02-24	4.399
2022-03-02	3.968
2022-03-03	4.004
2022-03-09	3.652
2022-03-10	3.569
2022-03-16	3.688
2022-03-17	3.681
2022-03-23	4.142
2022-03-24	3.949
2022-03-30	4.504
2022-03-31	4.217
2022-04-06	4.348
2022-04-07	4.541
2022-04-13	4.698
2022-04-14	4.539
2022-04-20	4.65
2022-04-21	4.594
2022-04-27	4.035
2022-04-28	5.05
2022-05-04	4.821
2022-05-05	4.153
2022-05-11	5.294
2022-05-12	5.192
2022-05-18	5.163
2022-05-19	5.153
2022-05-25	5.308
2022-05-27	5.397
2022-06-01	5.345
2022-06-02	5.313
2022-06-08	5.38
2022-06-09	5.446
2022-06-15	5.172
2022-06-16	5.44
2022-06-22	5.43
