# Supplementary material for: Beyond campus borders: wastewater surveillance sheds light on university COVID-19 interventions and their community impact
Source: Royal Society of Chemistry journal article supplement (doi:10.1039/d4ew00168k), 2024-07-05
Supplement: d4ew00168k3.xlsx [file d4ew00168k3.xlsx]

## Sheet: Failure Events Timeline
Table S1: Sampling Failure and Successes at Campus Locations
Date	ILLC	East Campus	Arnold Dining	Poling/NW Weatherford	Goss Stadium	Halsell	Beth Ray Center	Sackett	West	Finley	Callahan	GEM	Hawley/Buxton	Wilson/McNary/McNaryDining/Tebeau	SE Weatherford
2020-09-21	Failure	Success	Failure	Failure	Failure	Failure	Failure	Success	Failure	Success	Success	Failure	Success	Success	Failure
2020-09-27	Success	Success	Failure	Success	Failure	Success	Failure	Success	Failure	Success	Success	Success	Success	Success	Failure
2020-09-30	Success	Failure	Failure	Success	Failure	Success	Failure	Success	Success	Success	Success	Success	Success	Success	Success
2020-10-04	Success	Failure	Success	Success	Success	Success	Failure	Success	Failure	Success	Success	Success	Success	Success	Success
2020-10-07	Success	Success	Success	Success	Success	Success	Success	Success	Failure	Success	Success	Success	Success	Success	Success
2020-10-11	Success	Success	Success	Success	Success	Success	Success	Success	Success	Success	Success	Success	Success	Success	Success
2020-10-14	Success	Success	Success	Success	Success	Failure	Success	Success	Success	Success	Success	Success	Success	Success	Failure
2020-10-18	Success	Success	Success	Success	Success	Success	Success	Success	Success	Success	Success	Success	Failure	Success	Success
2020-10-21	Success	Success	Success	Success	Success	Success	Success	Success	Success	Success	Success	Success	Success	Success	Success
2020-10-25	Success	Success	Success	Success	Success	Success	Failure	Success	Success	Success	Success	Success	Failure	Success	Success
2020-10-28	Success	Success	Success	Success	Success	Success	Failure	Success	Success	Success	Success	Failure	Success	Success	Success
2020-11-01	Success	Success	Success	Success	Success	Success	Success	Success	Failure	Success	Success	Success	Success	Success	Success
2020-11-04	Success	Success	Success	Success	Success	Success	Success	Success	Success	Failure	Success	Success	Success	Success	Success
2020-11-08	Success	Success	Success	Success	Success	Failure	Success	Success	Success	Success	Success	Success	Success	Success	Success
2020-11-11	Success	Success	Success	Success	Success	Success	Success	Success	Success	Success	Success	Success	Success	Success	Success
2020-11-15	Failure	Success	Success	Success	Success	Success	Success	Success	Success	Success	Success	Success	Success	Success	Failure
2020-11-18	Success	Failure	Success	Success	Success	Success	Success	Success	Success	Success	Success	Success	Success	Success	Success
2020-11-22	Failure	Not Taken	Success	Success	Success	Success	Failure	Success	Success	Success	Success	Failure	Success	Success	Success
2020-12-02	Success	Not Taken	Success	Success	Success	Success	Success	Success	Success	Success	Success	Success	Success	Failure	Success
2021-01-06	Failure	Not Taken	Success	Success	Success	Success	Success	Success	Success	Success	Success	Success	Success	Failure	Success
2021-01-10	Failure	Not Taken	Success	Success	Failure	Failure	Success	Success	Success	Success	Success	Success	Success	Success	Success
2021-01-13	Success	Not Taken	Success	Success	Success	Success	Success	Success	Success	Success	Success	Success	Success	Success	Failure
2021-01-17	Success	Not Taken	Success	Success	Success	Success	Success	Success	Success	Success	Success	Success	Success	Success	Success
2021-01-20	Success	Not Taken	Success	Success	Success	Success	Success	Success	Success	Success	Success	Success	Success	Success	Failure
2021-01-24	Success	Not Taken	Success	Success	Success	Failure	Success	Success	Success	Success	Success	Success	Success	Success	Success
2021-01-27	Success	Not Taken	Success	Success	Success	Success	Success	Success	Success	Success	Success	Success	Success	Success	Success
2021-01-31	Failure	Not Taken	Success	Success	Success	Success	Success	Success	Success	Success	Success	Success	Success	Success	Success
2021-02-03	Success	Not Taken	Success	Success	Success	Success	Success	Success	Success	Success	Success	Success	Success	Success	Success
2021-02-07	Success	Not Taken	Success	Success	Success	Success	Success	Success	Success	Success	Success	Success	Success	Success	Success
2021-02-10	Failure	Not Taken	Success	Success	Success	Success	Success	Success	Success	Success	Success	Success	Success	Success	Success
2021-02-14	Success	Success	Success	Success	Success	Failure	Success	Success	Success	Success	Success	Success	Success	Success	Success
2021-02-17	Success	Success	Success	Success	Success	Success	Success	Success	Success	Success	Success	Success	Success	Success	Success
2021-02-21	Success	Failure	Success	Failure	Success	Failure	Success	Success	Success	Success	Success	Success	Success	Success	Success
2021-02-24	Success	Success	Success	Success	Success	Success	Success	Failure	Success	Success	Success	Success	Success	Success	Success
2021-02-28	Success	Success	Success	Failure	Success	Success	Success	Failure	Success	Failure	Success	Success	Success	Success	Success
2021-03-03	Success	Success	Success	Success	Success	Success	Success	Failure	Success	Success	Success	Success	Success	Success	Success
2021-03-07	Success	Success	Failure	Failure	Failure	Failure	Failure	Success	Failure	Success	Success	Success	Failure	Success	Success
2021-03-10	Success	Success	Success	Success	Success	Success	Success	Success	Success	Success	Success	Success	Success	Success	Success
2021-03-14	Success	Success	Success	Success	Failure	Failure	Failure	Success	Success	Success	Success	Success	Success	Success	Success
2021-03-17	Success	Success	Success	Success	Success	Success	Success	Success	Success	Success	Success	Success	Success	Failure	Success
2021-03-28	Success	Success	Success	Success	Success	Failure	Success	Success	Success	Success	Success	Success	Failure	Success	Success
2021-03-31	Success	Success	Success	Success	Success	Success	Success	Success	Success	Success	Success	Success	Success	Success	Success
2021-04-04	Failure	Success	Success	Success	Success	Success	Success	Success	Success	Success	Failure	Success	Success	Success	Failure
2021-04-07	Success	Success	Success	Success	Failure	Success	Success	Success	Success	Success	Success	Success	Success	Success	Failure
2021-04-11	Success	Success	Success	Success	Success	Success	Success	Failure	Failure	Success	Success	Failure	Success	Success	Success
2021-04-14	Failure	Success	Success	Success	Success	Failure	Success	Success	Success	Success	Success	Success	Success	Success	Success
2021-04-18	Failure	Failure	Success	Success	Failure	Success	Success	Success	Success	Success	Success	Success	Success	Failure	Success
2021-04-21	Failure	Success	Success	Success	Success	Success	Success	Success	Failure	Success	Success	Success	Success	Success	Success
2021-04-25	Failure	Success	Success	Success	Failure	Success	Success	Success	Failure	Success	Success	Success	Success	Success	Success
2021-04-28	Failure	Success	Failure	Success	Success	Success	Success	Success	Success	Success	Failure	Success	Success	Success	Success
2021-05-02	Failure	Success	Success	Success	Success	Success	Success	Success	Success	Success	Success	Success	Success	Success	Success
2021-05-05	Failure	Success	Success	Success	Success	Success	Success	Success	Success	Success	Success	Success	Success	Success	Success
2021-05-09	Failure	Success	Success	Success	Failure	Success	Success	Success	Success	Success	Success	Success	Success	Success	Success
2021-05-12	Success	Success	Success	Success	Success	Success	Success	Success	Success	Success	Success	Success	Success	Success	Success
2021-05-16	Success	Success	Failure	Success	Failure	Failure	Success	Success	Success	Failure	Success	Success	Success	Success	Failure
2021-05-19	Success	Success	Success	Success	Success	Success	Success	Success	Success	Success	Success	Success	Success	Failure	Success
2021-05-23	Success	Success	Success	Success	Success	Success	Failure	Failure	Success	Success	Success	Success	Success	Success	Success
2021-05-26	Success	Success	Success	Success	Success	Success	Success	Success	Success	Success	Success	Success	Success	Success	Success
2021-05-30	Success	Success	Success	Success	Success	Success	Success	Success	Failure	Success	Success	Success	Success	Success	Failure
2021-06-02	Success	Success	Success	Success	Success	Failure	Success	Success	Success	Success	Success	Success	Success	Success	Success
2021-06-06	Success	Success	Success	Success	Success	Success	Success	Success	Success	Success	Success	Success	Success	Success	Success
2021-06-09	Success	Success	Success	Success	Success	Success	Success	Success	Success	Success	Success	Success	Success	Success	Success
2021-06-12	Success	Success	Failure	Not Taken	Success	Not Taken	Success	Not Taken	Not Taken	Success	Not Taken	Not Taken	Not Taken	Not Taken	Not Taken
2021-06-16	Success	Success	Success	Not Taken	Failure	Not Taken	Success	Not Taken	Not Taken	Success	Not Taken	Not Taken	Not Taken	Not Taken	Not Taken
2021-06-19	Success	Success	Success	Not Taken	Success	Not Taken	Success	Not Taken	Not Taken	Success	Not Taken	Not Taken	Not Taken	Not Taken	Not Taken
2021-06-23	Success	Success	Success	Not Taken	Success	Not Taken	Success	Not Taken	Not Taken	Success	Not Taken	Not Taken	Not Taken	Not Taken	Not Taken
2021-06-26	Success	Success	Success	Not Taken	Success	Not Taken	Success	Not Taken	Not Taken	Success	Not Taken	Not Taken	Not Taken	Not Taken	Not Taken
2021-06-30	Success	Success	Success	Not Taken	Success	Not Taken	Success	Not Taken	Not Taken	Success	Not Taken	Not Taken	Not Taken	Not Taken	Not Taken
2021-07-03	Success	Success	Success	Not Taken	Success	Not Taken	Success	Not Taken	Not Taken	Success	Not Taken	Not Taken	Not Taken	Not Taken	Not Taken
2021-07-07	Failure	Success	Success	Not Taken	Success	Not Taken	Success	Not Taken	Not Taken	Success	Not Taken	Not Taken	Not Taken	Not Taken	Not Taken
2021-07-10	Success	Failure	Success	Not Taken	Success	Not Taken	Failure	Not Taken	Not Taken	Failure	Not Taken	Not Taken	Not Taken	Not Taken	Not Taken
2021-07-14	Success	Success	Success	Not Taken	Success	Not Taken	Success	Not Taken	Not Taken	Success	Not Taken	Not Taken	Not Taken	Not Taken	Not Taken
2021-07-18	Success	Success	Failure	Not Taken	Success	Not Taken	Success	Not Taken	Not Taken	Success	Not Taken	Not Taken	Not Taken	Not Taken	Not Taken
2021-07-21	Success	Success	Success	Not Taken	Success	Not Taken	Success	Not Taken	Not Taken	Success	Not Taken	Not Taken	Not Taken	Not Taken	Not Taken
2021-07-24	Failure	Success	Success	Not Taken	Success	Not Taken	Failure	Not Taken	Not Taken	Failure	Not Taken	Not Taken	Not Taken	Not Taken	Not Taken
2021-07-28	Success	Success	Failure	Not Taken	Success	Not Taken	Success	Not Taken	Not Taken	Success	Not Taken	Not Taken	Not Taken	Not Taken	Not Taken
2021-07-30	Success	Success	Success	Not Taken	Success	Not Taken	Success	Not Taken	Not Taken	Success	Not Taken	Not Taken	Not Taken	Not Taken	Not Taken
2021-08-04	Failure	Success	Success	Not Taken	Success	Not Taken	Success	Not Taken	Not Taken	Success	Not Taken	Not Taken	Not Taken	Not Taken	Not Taken
2021-08-08	Success	Success	Success	Not Taken	Success	Not Taken	Success	Not Taken	Not Taken	Success	Not Taken	Not Taken	Not Taken	Not Taken	Not Taken
2021-08-11	Success	Failure	Success	Not Taken	Success	Not Taken	Success	Not Taken	Not Taken	Success	Not Taken	Not Taken	Not Taken	Not Taken	Not Taken
2021-08-14	Failure	Success	Success	Not Taken	Success	Not Taken	Success	Not Taken	Not Taken	Success	Not Taken	Not Taken	Not Taken	Not Taken	Not Taken
2021-08-18	Success	Success	Success	Not Taken	Success	Not Taken	Failure	Not Taken	Not Taken	Success	Not Taken	Not Taken	Not Taken	Not Taken	Not Taken
2021-08-21	Success	Success	Success	Not Taken	Success	Not Taken	Success	Not Taken	Not Taken	Success	Not Taken	Not Taken	Not Taken	Not Taken	Not Taken
2021-08-25	Success	Success	Success	Not Taken	Success	Not Taken	Success	Not Taken	Not Taken	Success	Not Taken	Not Taken	Not Taken	Not Taken	Not Taken
2021-08-28	Success	Success	Success	Not Taken	Success	Not Taken	Success	Not Taken	Not Taken	Success	Not Taken	Not Taken	Not Taken	Not Taken	Not Taken
2021-09-03	Success	Success	Success	Not Taken	Success	Not Taken	Success	Not Taken	Not Taken	Success	Not Taken	Not Taken	Not Taken	Not Taken	Not Taken
2021-09-08	Success	Success	Success	Not Taken	Success	Not Taken	Success	Not Taken	Not Taken	Success	Not Taken	Not Taken	Not Taken	Not Taken	Not Taken
2021-09-11	Failure	Success	Success	Failure	Success	Success	Success	Failure	Failure	Success	Success	Success	Success	Success	Failure
2021-09-15	Success	Success	Success	Failure	Success	Success	Success	Success	Success	Success	Success	Success	Failure	Success	Failure
2021-09-18	Success	Success	Success	Success	Success	Success	Failure	Success	Success	Success	Success	Success	Success	Success	Success
2021-09-22	Success	Success	Success	Success	Success	Success	Failure	Success	Success	Failure	Success	Success	Success	Success	Success
2021-09-25	Failure	Success	Success	Success	Success	Failure	Success	Success	Success	Failure	Success	Success	Success	Success	Failure
2021-09-29	Success	Success	Success	Success	Success	Success	Success	Success	Success	Success	Success	Success	Success	Success	Success
2021-10-02	Success	Failure	Success	Success	Success	Success	Success	Success	Success	Success	Success	Success	Success	Success	Success
2021-10-06	Success	Success	Success	Success	Success	Success	Success	Success	Success	Success	Success	Success	Success	Success	Success
2021-10-09	Success	Failure	Success	Success	Success	Success	Success	Success	Success	Success	Success	Failure	Failure	Success	Success
2021-10-13	Success	Success	Success	Success	Success	Success	Success	Success	Success	Success	Success	Success	Success	Success	Success
2021-10-16	Success	Success	Success	Success	Success	Success	Success	Success	Success	Success	Success	Success	Success	Success	Success
2021-10-20	Success	Success	Success	Success	Success	Success	Success	Success	Success	Success	Success	Success	Success	Success	Success
2021-10-23	Success	Success	Success	Success	Success	Success	Success	Success	Failure	Success	Success	Failure	Success	Success	Failure
2021-10-27	Success	Success	Success	Success	Success	Success	Success	Success	Success	Success	Success	Success	Success	Success	Success
2021-10-30	Failure	Success	Failure	Success	Success	Success	Success	Success	Failure	Success	Success	Success	Success	Success	Failure
2021-11-03	Success	Success	Success	Success	Success	Success	Success	Success	Success	Success	Success	Success	Success	Success	Success
2021-11-06	Success	Success	Success	Success	Success	Success	Success	Success	Success	Success	Success	Success	Success	Success	Success
2021-11-13	Success	Success	Success	Success	Success	Success	Success	Success	Success	Success	Success	Success	Success	Success	Success
2021-11-17	Success	Success	Success	Success	Success	Success	Success	Success	Success	Success	Success	Success	Success	Success	Success
2021-11-20	Success	Success	Success	Success	Success	Success	Success	Success	Success	Success	Success	Success	Success	Success	Success
2021-12-01	Success	Success	Success	Success	Success	Success	Failure	Success	Success	Success	Success	Success	Success	Success	Success
2021-12-04	Success	Success	Success	Success	Success	Success	Success	Failure	Success	Success	Failure	Failure	Failure	Success	Failure
2021-12-08	Success	Success	Success	Success	Success	Success	Success	Success	Success	Success	Success	Success	Success	Success	Success
2021-12-15	Not Taken	Success	Not Taken	Not Taken	Not Taken	Not Taken	Not Taken	Not Taken	Not Taken	Not Taken	Not Taken	Not Taken	Not Taken	Not Taken	Not Taken
2021-12-22	Not Taken	Success	Not Taken	Not Taken	Not Taken	Not Taken	Not Taken	Not Taken	Not Taken	Not Taken	Not Taken	Not Taken	Not Taken	Not Taken	Not Taken
2021-12-29	Not Taken	Success	Not Taken	Not Taken	Not Taken	Not Taken	Not Taken	Not Taken	Not Taken	Not Taken	Not Taken	Not Taken	Not Taken	Not Taken	Not Taken
2022-01-01	Not Taken	Success	Not Taken	Not Taken	Not Taken	Not Taken	Not Taken	Not Taken	Not Taken	Not Taken	Not Taken	Not Taken	Not Taken	Not Taken	Not Taken
2022-01-05	Success	Success	Success	Success	Success	Success	Success	Success	Success	Success	Success	Success	Success	Success	Success
2022-01-08	Success	Success	Success	Success	Success	Success	Success	Failure	Success	Success	Success	Success	Success	Success	Success
2022-01-12	Success	Success	Success	Failure	Success	Success	Success	Failure	Success	Success	Success	Success	Success	Success	Success
2022-01-15	Success	Success	Success	Failure	Success	Success	Success	Success	Success	Success	Success	Success	Success	Success	Success
2022-01-19	Success	Success	Success	Success	Success	Success	Success	Success	Success	Success	Success	Success	Success	Success	Success
2022-01-22	Success	Success	Success	Success	Success	Success	Success	Success	Failure	Success	Success	Success	Success	Success	Success
2022-01-26	Success	Success	Success	Success	Success	Success	Success	Success	Success	Success	Success	Success	Success	Failure	Success
2022-01-29	Success	Success	Success	Success	Success	Success	Success	Failure	Success	Success	Success	Success	Success	Success	Success
2022-02-02	Failure	Success	Success	Success	Success	Success	Success	Success	Success	Success	Success	Success	Success	Success	Success
2022-02-05	Success	Success	Success	Success	Success	Success	Success	Success	Success	Success	Success	Success	Failure	Success	Success
2022-02-09	Success	Success	Success	Success	Success	Success	Success	Success	Success	Success	Success	Success	Success	Success	Failure
2022-02-12	Success	Success	Success	Failure	Success	Success	Success	Success	Success	Failure	Success	Success	Success	Success	Success
2022-02-16	Success	Success	Success	Success	Success	Success	Success	Failure	Success	Success	Success	Success	Success	Success	Success
2022-02-19	Failure	Success	Success	Success	Success	Success	Success	Success	Success	Success	Success	Success	Success	Success	Success
2022-02-23	Success	Success	Success	Success	Success	Success	Success	Success	Success	Success	Success	Success	Success	Success	Success
2022-02-26	Success	Success	Success	Failure	Success	Failure	Failure	Success	Success	Success	Success	Success	Success	Success	Success
2022-03-02	Success	Failure	Success	Success	Success	Success	Success	Success	Success	Success	Success	Failure	Success	Success	Success
2022-03-05	Success	Success	Success	Success	Success	Failure	Failure	Failure	Success	Success	Success	Success	Success	Success	Success
2022-03-09	Success	Success	Success	Success	Success	Success	Success	Success	Success	Success	Success	Success	Success	Failure	Success
2022-03-12	Success	Success	Success	Success	Success	Success	Success	Success	Success	Success	Success	Success	Success	Success	Success
2022-03-16	Success	Success	Success	Success	Success	Success	Success	Success	Success	Success	Success	Success	Success	Success	Success
2022-03-19	Success	Success	Success	Success	Not Taken	Success	Success	Success	Success	Success	Success	Success	Success	Success	Success
2022-03-22	Success	Success	Not Taken	Not Taken	Success	Not Taken	Success	Not Taken	Not Taken	Not Taken	Not Taken	Not Taken	Not Taken	Not Taken	Not Taken
2022-03-25	Success	Success	Not Taken	Not Taken	Success	Not Taken	Success	Not Taken	Not Taken	Not Taken	Not Taken	Not Taken	Not Taken	Not Taken	Not Taken
2022-03-30	Failure	Failure	Success	Failure	Success	Success	Success	Success	Success	Success	Success	Success	Success	Success	Success
2022-04-02	Success	Success	Failure	Success	Success	Failure	Success	Success	Success	Failure	Success	Success	Success	Success	Success
2022-04-06	Success	Failure	Success	Success	Success	Success	Success	Success	Success	Success	Failure	Success	Success	Success	Success
2022-04-09	Success	Success	Success	Success	Success	Failure	Failure	Success	Success	Success	Success	Success	Success	Success	Success
2022-04-13	Success	Success	Success	Not Taken	Success	Success	Success	Success	Success	Success	Success	Not Taken	Success	Success	Success
2022-04-16	Success	Success	Success	Failure	Failure	Success	Success	Failure	Success	Success	Success	Success	Success	Success	Success
2022-04-20	Success	Success	Success	Success	Success	Failure	Success	Success	Success	Success	Success	Success	Success	Failure	Success
2022-04-23	Success	Failure	Success	Success	Success	Success	Success	Success	Success	Success	Success	Success	Success	Failure	Success
2022-04-27	Success	Failure	Success	Success	Success	Success	Success	Success	Success	Success	Success	Success	Success	Success	Success
2022-04-30	Success	Failure	Success	Success	Success	Success	Success	Success	Success	Success	Success	Success	Failure	Success	Success
2022-05-04	Success	Failure	Success	Success	Success	Success	Success	Success	Success	Success	Success	Success	Success	Success	Success
2022-05-07	Success	Failure	Failure	Failure	Success	Success	Success	Success	Success	Success	Success	Failure	Success	Success	Success
2022-05-11	Success	Success	Success	Success	Success	Success	Success	Success	Success	Success	Success	Success	Success	Success	Success
2022-05-14	Failure	Success	Success	Success	Failure	Success	Success	Success	Success	Success	Success	Success	Failure	Success	Success
2022-05-18	Success	Success	Success	Success	Success	Success	Success	Success	Success	Success	Success	Success	Success	Success	Success
2022-05-21	Success	Success	Success	Success	Success	Success	Success	Success	Failure	Success	Success	Failure	Success	Failure	Success
2022-05-25	Success	Success	Success	Success	Success	Success	Success	Success	Success	Success	Success	Success	Success	Success	Success
2022-05-28	Success	Success	Success	Failure	Success	Success	Success	Failure	Failure	Success	Success	Success	Success	Failure	Success
2022-06-01	Success	Success	Success	Success	Success	Success	Success	Success	Success	Success	Success	Success	Success	Success	Success
2022-06-04	Success	Success	Success	Success	Success	Success	Success	Success	Success	Success	Failure	Success	Success	Success	Success
2022-06-08	Success	Success	Success	Success	Failure	Failure	Failure	Success	Success	Success	Success	Success	Success	Success	Success
2022-06-10	Success	Success	Not Taken	Not Taken	Not Taken	Not Taken	Not Taken	Not Taken	Not Taken	Success	Not Taken	Not Taken	Not Taken	Not Taken	Not Taken
2022-06-11	Success	Success	Success	Success	Not Taken	Success	Not Taken	Success	Not Taken	Success	Not Taken	Success	Not Taken	Success	Success
2022-06-12	Success	Success	Not Taken	Not Taken	Not Taken	Not Taken	Not Taken	Not Taken	Not Taken	Success	Not Taken	Not Taken	Not Taken	Not Taken	Not Taken
2022-06-15	Success	Success	Not Taken	Not Taken	Not Taken	Not Taken	Not Taken	Not Taken	Not Taken	Success	Not Taken	Not Taken	Not Taken	Not Taken	Not Taken
2022-06-18	Success	Success	Not Taken	Not Taken	Not Taken	Not Taken	Not Taken	Not Taken	Not Taken	Success	Not Taken	Not Taken	Not Taken	Not Taken	Not Taken
Total Successes	133	127	142	114	139	109	135	115	112	149	123	118	118	118	112
Total Failures	27	17	12	14	15	20	20	14	16	9	5	10	10	11	17
Total Samples	160	144	154	128	154	129	155	129	128	158	128	128	128	129	129
Percent Failure	0.16875	0.118056	0.0779221	0.109375	0.0974026	0.155039	0.129032	0.108527	0.125	0.056962	0.0390625	0.078125	0.078125	0.0852713	0.131783
Key
Success	Successful sample taken at location
Failure	Failure event occurred resulting in no sample
Not Taken	No sample collected at the location
